# Supplementary material for: The validity of health-related quality of life questionnaires in bronchiectasis: a systematic review and meta-analysis
Source: HighWire-hosted journal article supplement (doi:10.1136/thoraxjnl-2015-207315), 2016-02-11
Supplement: thoraxjnl-2015-207315supp.pdf [file thoraxjnl-2015-207315supp.pdf]

## ONLINE SUPPLEMENTS

**Online Appendix 1.** Quality criteria used to assess articles included in the review.

**Online Appendix 2.** Supplemental analysis.

**Online Appendix 3.** Health-related quality of life questionnaires.

**Online Appendix 4.** The validation of translated health-related quality of life questionnaires.

**Online Appendix 5.** Floor/ceiling effects and missing data.

**Online Appendix 6.** Associations between health-related quality of life questionnaires.

**Table E1.** Systematic review search terms and number of retrieved studies for each database.

**Table E2.** Health-related quality of life scores published for Leicester Cough Questionnaire, St George's Respiratory Questionnaire and Quality of Life - Bronchiectasis.

**Table E3.** Minimal clinically important difference (MCID) of health-related quality of life questionnaires utilized in bronchiectasis studies.

**Table E4.** Standardised response means for the health-related quality of life questionnaires, based on randomised-control trials identified in original study search.

**Table E5.** Correlations of health-related quality of life with other clinical measures reported in single studies (not included in the meta-analysis).

**Figure E1.** Forest plot for the correlation between health-related quality of life and wheeze.

**Figure E2.** Forest plot for the correlation between health-related quality of life and fatigue.

**Figure E3.** Forest plot for the correlation between health-related quality of life and depression.

**Figure E4.** Forest plot for the correlation between health-related quality of life and sputum volume.

**Figure E5.** Forest plot for the correlation between health-related quality of life and presence/colonisation with *pseudomonas aeruginosa*.

**Figure E6.** Forest plot for the correlation between health-related quality of life and extent of bronchiectasis on computed tomography scan.

**Figure E7.** Forest plot for the correlation between health-related quality of life and oxygen saturation.

**Figure E8.** Forest plot for the correlation between health-related quality of life and anxiety.

**Figure E9.** Forest plot for the correlation between health-related quality of life and rate of hospital admissions.

**Figure E10.** Forest plot for the correlation between health-related quality of life and rate of infections/exacerbations.

**Figure E11.** Forest plot for the correlation between health-related quality of life and forced vital capacity (FVC).

**Figure E12.** Forest plot for the correlation between health-related quality of life and sputum colour.

**Figure E13.** Forest plot for the correlation between health-related quality of life and positive bacterial sputum culture.

**Figure E14.** Forest plot for the correlation between health-related quality of life and comorbidities.

**Figure E15.** Funnel plot of FEV<sub>1</sub>% assessing the publication bias for the relevant meta-analysis studies.

**Figure E16.** Funnel plot of exercise capacity assessing the publication bias for the relevant meta-analysis studies.

**References.** References of supplementary material and additional references of the main paper.

## ONLINE APPENDIX 1

### QUALITY CRITERIA USED TO ASSESS ARTICLES INCLUDED IN THE REVIEW

#### A. Bronchiectasis Case Definition and HRQOL Study Subject Assembly

1. Were the inclusion and exclusion criteria reported?
2. Did all bronchiectasis subjects undergo CT or bronchography?
3. Inclusion criteria included symptoms and physical examination consistent with a diagnosis of bronchiectasis?
4. Did the authors state if acute or stable disease and definition of it?
5. Was cystic fibrosis excluded for bronchiectasis?
6. Did the authors state which subjects would complete the HRQOL instrument?

#### B. Clinical Characteristics of Bronchiectasis Subjects

7. For the subjects with bronchiectasis, is the age distribution given?
8. For the subjects with bronchiectasis, is the gender distribution given?
9. For the subjects with bronchiectasis, is the race/ethnicity distribution given?
10. For the subjects with bronchiectasis, are there data for FEV<sub>1</sub>?
11. For the subjects with bronchiectasis, are there data for sputum microbiology?
12. For the subjects with bronchiectasis, are there data for pseudomonas chronic colonisation or intermittent infection?
13. For the subjects with bronchiectasis, are there data for sputum volume?
14. For the subjects with bronchiectasis, are there data for aetiology?
15. For the subjects with bronchiectasis, are there data for exacerbation rate?
16. For the subjects with bronchiectasis, are there data for medications?
17. For the subjects with bronchiectasis, are there data for oxygen requirements?
18. For the subjects with bronchiectasis, is there an objective measure (e.g. a CT scoring scale) for the degree of abnormality on CT?
19. Were potentially relevant comorbidities discussed?

#### C. HRQOL Instrument Selection

20. \*Was this study designed to evaluate, validate or develop a HRQOL questionnaire in bronchiectasis?
21. If this study is not designed to “validate” an instrument, did the authors provide a rationale for choosing the HRQOL instrument(s) studied?
22. Was the instrument(s) chosen for this study specifically designed to assess HRQOL in bronchiectasis patients?
23. If this study is not a study designed to “validate” an instrument, did the authors discuss (or reference) previously published data that supports the reliability (e.g. test-retest and internal consistency) of the chosen instrument(s) in bronchiectasis patients?
24. If a translated instrument was used, did the authors discuss (or reference) data that verifies the cultural validity of the translated instrument?

#### D. HRQOL Endpoints and Instrument Administration

25. \*Was the hypothesis regarding HRQOL stated?
26. Did the authors state which instrument scores (e.g. the total instrument score or specific domain scores) were specified as endpoints?
27. Was the instrument(s) administered in the format (e.g. self- or interviewer-administered) that the instrument developers intended?
28. Did the authors adequately describe the timing of instrument(s) administration (as applicable) in the context of a single administration, an individual study visit, and throughout the course of the study?
29. Did the authors provide details of the scoring methods used?
30. Did the authors provide information on how to interpret scores (e.g. do higher scores indicate better or worse HRQOL)?

#### E. Methods of Statistical Analysis

31. Did the authors provide documentation of sample size estimation?
32. Did the authors describe how missing data (e.g. items missing responses and data from drop-outs) would be accounted for (e.g. by using imputation methods)?
33. Did the authors define what would deem a subject’s HRQOL data inadequate (or did they define what constitutes adequate data) for analysis?
34. Were the statistical methods used to assess (and if applicable, to compare) HRQOL described in enough detail that other researchers could repeat the analysis if the full data were made available?

#### F. Reporting Results

35. Was compliance (% of patients who were asked to complete the instrument and actually completed it) data for each administration given?
36. \*Did the investigators calculate Internal Consistency Reliability (i.e. Cronbach’s alpha) for the instrument (and/or its subscales in this study’s population)?
37. \*Were the floor and ceiling effect levels reported?
38. Were the results of the primary and secondary HRQOL analyses presented adequately (e.g. mean or median scores) to support the conclusions drawn?
39. Were confidence intervals or p-values reported for the results of the hypothesized HRQOL endpoints?
40. Did the authors adequately report missing data (e.g. due to item non-response, due to non-completion of the instrument)?
41. Were subjects excluded from the HRQOL analysis?
  - a. If “Yes” did the investigators describe the circumstances surrounding subjects excluded from the analysis?
42. Was the clinical significance of the HRQOL results addressed?

**\*Not applicable for the studies included in the meta-analysis of HRQOL correlations only.**

## ONLINE APPENDIX 2

### SUPPLEMENTAL ANALYSIS

The correlation coefficients were converted to Fisher's  $Z$  using  $z = 2^{-1} \cdot \ln \left\{ \frac{(1+r)}{(1-r)} \right\}$  and subjected to meta-analytic models (Borenstein et al. 2011). For the final interpretation of the findings, a mean  $r$  correlation coefficient for associations was calculated from Fisher's  $Z$  as

per  $r = \frac{\exp(2z) - 1}{\exp(2z) + 1} = \tanh(z)$ . A random effects model was used to produce a pooled estimate of the correlation coefficients. Statistical heterogeneity was assessed using Cochran's  $Q$  test, which examines the null hypothesis that all studies are evaluating the same effect (Higgins et al. 2003). Statistical significance for heterogeneity was set as  $p \leq 0.10$ . Heterogeneity was quantified using the  $I^2$  statistic, indicating the percentage of total variation across studies that is due to heterogeneity rather than chance (Higgins et al. 2003).  $I^2$  value of 0% was considered to indicate no observed heterogeneity whilst a value  $>50\%$  substantial heterogeneity (Higgins et al. 2002).

A funnel plot was created for the clinical measures with  $\geq 10$  studies (Cochrane Group). This is a scatter plot of the effect estimates from individual studies against a measurement of the study's sample size or precision. Resemblance of a symmetrical inverted funnel supports that findings are due to sampling variation alone; thus absence of bias (Sterne et al. 2011). For the funnel plots indicating publication bias, an Engel's test was performed (null hypothesis: studies are no subject to publication bias, significance  $p < 0.05$ ). Rosenthal's  $N$  expresses the number of un-retrieved or negative studies that are needed to overturn the results of the meta-analysis and create a non-significant meta-analytic result.

References in online supplement.

## **ONLINE APPENDIX 3**

### **HEALTH-RELATED QUALITY OF LIFE QUESTIONNAIRES**

**Saint George's Respiratory Questionnaire (SGRQ):** was originally developed to measure HRQOL of patients with Chronic Obstructive Pulmonary Disease (COPD) and asthma. It has 50 items (76 weighted responses) categorised into 3 domains: symptoms (8 items), activity (16 items) and impact (26 items). The total score ranges from 0 to 100, with 0 indicating no HRQOL impairment (Jones et al. 1992).

**Leicester Cough Questionnaire (LCQ):** is a cough-specific questionnaire, which assesses the impact of cough on HRQOL and was developed for adults with chronic cough. LCQ has 19 items with 7-point Likert response scales. LCQ is divided into 3 domains: physical (8 items), psychological (7 items) and social (4 items). The total score is calculated using the sum of the domain scores and ranges from 3 to 21, with lower scores indicating greater HRQOL impairment (Birring et al. 2003).

**Chronic Obstructive Pulmonary Disease Assessment Tool (CAT):** was developed for patients with COPD, using Rasch Analysis (a quantitative method of eliminating the instrument's items to create a linear scale). It consists of 8 items with 0-5 response scales. The total score ranges from 0 to 40, where 0 indicates no HRQOL impairment (Jones et al. 2009).

**Chronic Respiratory Disease Questionnaire (CRDQ):** is an interviewer-administered questionnaire measuring physical and emotional aspects of respiratory disease. It has 20 items categorised into the domains of dyspnoea, fatigue, emotional function and mastery. The higher score indicates no HRQOL impairment (Guyatt et al. 1987).

**Quality of Life - Bronchiectasis (QOL-B):** was developed specifically for assessing HRQOL in bronchiectasis. QOL-B Version 3.1 has 37 items in 8 domains: respiratory symptoms, physical functioning, vitality, role functioning, health perceptions, emotional functioning, social functioning and treatment burden. Domain scores range from 0 to 100, with higher scores indicating better HRQOL, and no total score is calculated (Quittner et al. 2014).

**Medical Outcomes Study 36-item Short-Form Health Survey (SF-36):** is a generic HRQOL questionnaire that has 8 subscales: bodily pain, general health, mental health, physical functioning, role emotional, role physical, social functioning and vitality. These scales are grouped into either SF-36 Physical and SF-36 Mental Component scores that range from 0 to 100, with 0 indicating greater HRQOL impairment (Ware and Sherbourne 1992).

**Cough Quality of Life Questionnaire (CQLQ):** is a questionnaire specific to cough. It consists of 28 items and a 4-point Likert response scale and has 6 domains: physical complaints, psychosocial issues, functional abilities, emotional well-being, extreme physical complaints and personal safety fears. Higher scores indicate greater HRQOL impairment. Maximum score is 112 (French et al. 2002).

**EuroQOL:** is a generic health-related quality of life questionnaire consisting of 2 parts. The first is the EuroQOL 5 dimension component (EQ-5D) for mobility, self-care, usual activities, pain/discomfort and anxiety/depression, which has a 3-category response scale. Its scoring has a total of 243 possible health states defined in a 5 digit code, where each state is referred to in its place on the code (eg. 11111 indicates no problem in any domain). The second part is a 100 mm vertical scale, the EuroQOL visual analogue scale (EQ-VAS), where

100 indicates the best state you can imagine and 0 the worst state you can imagine. A single index can be generated (Brooks 1996).

**20-Item Sino-Nasal Outcome Test (SNOT-20):** is a health-related quality of life questionnaire developed for patients with rhinosinusitis. This is a modification of the 31-item Rhinosinusitis Outcome Measure, and contains 20 nose, sinus and general items. Greater score indicates poorer quality of life (Piccirillo et al. 2002).

References in online supplement.

## **ONLINE APPENDIX 4**

### **THE VALIDATION OF TRANSLATED HEALTH-RELATED QUALITY OF LIFE QUESTIONNAIRES**

Eighteen studies used a translated HRQOL questionnaire. Translated SGRQ was used in Spain (Chalmers et al. 2014, Guilemany et al. 2009, Giron Moreno et al. 2013), Italy (Chalmers et al. 2014), France (Chalmers et al. 2014), Belgium (Chalmers et al. 2014), Korea (Lee et al. 2012), Netherlands (Altenburg et al. 2014), Mexico (Galindo-Pacheco et al. 2013), Egypt (Morsi et al. 2014), China (Gao et al. 2014), Hong Kong (Chan et al. 2002) and Israel (Eshed et al. 2007); QOL-B in Italy, Belgium, Spain, France and Netherlands (Quittner et al. 2015); LCQ in Spain (Casilda Oliveira et al. 2014), Belgium (Chalmers et al. 2014), Netherlands (Altenburg et al. 2014) and Turkey (Ozalp et al. 2012); SF-36 in Spain (Guilemany et al. 2006, Guilemany et al. 2009), Netherlands (Altenburg et al. 2014) and Brazil (Jacques et al. 2012b); and CAT in Korea (Lee et al. 2012). Eight out of 18 studies reported or referenced a validation of the translated questionnaire. The validation of translated HRQOL questionnaires has been reported for: SGRQ in Mexican (Galindo-Pacheco et al. 2013), Hong Kong Chinese (Chan et al. 2002), Chinese (Gao et al. 2014) and Korean (Lee et al. 2012), LCQ in Spanish (Giron Moreno et al. 2013), Dutch (Huisman et al. 2007) and Turkish (Kalpaklioglu et al. 2005), QOL-B in all aforementioned languages (Quittner et al. 2015); and SF-36 in Spanish (Guilemany et al. 2006, Guilemany et al. 2009) and Portuguese Brazilian (Jacques et al. 2012a). These studies validated the translated questionnaires in patients with bronchiectasis, with only exceptions being the Korean SGRQ (range of chronic respiratory diseases) (Lee et al. 2012); Dutch and Turkish LCQ (chronic cough) (Huisman et al. 2007, Kalpaklioglu et al. 2005) and the Brazilian SF-36 (COPD and rheumatoid arthritis) (Jacques et al. 2012a). One study used factor analysis to demonstrate



that the structure of the translated Spanish questionnaire was similar to the original SGRQ (Martinez Garcia et al. 2005).

References in online supplement.

## **ONLINE APPENDIX 5**

### **FLOOR/CEILING EFFECTS AND MISSING DATA**

Floor and ceiling effects and missing data were reported for only 2 HRQOL questionnaires, SGRQ and QOL-B. The floor and ceiling effects for SGRQ in English and Spanish versions were small for all domains (<3%) (Wilson et al. 1997a, Martinez Garcia et al. 2005). The floor effect for SGRQ Hong-Kong Chinese was <6.4% (activity domain 11.7%) and ceiling effect <1.1% (Chan et al. 2002). English and Spanish QOL-B floor effects were  $\leq 5\%$ , with the exception of 3 domains: vitality (7%), physical (6%) and social functioning (6%). The QOL-B ceiling effects were highest in 3 out of 8 domains: treatment burden 17%, social functioning 22%, role functioning 22%, and emotional functioning 24% (all other domains <14%) (Quittner et al. 2014, Quittner et al. 2015, Casilda Oliveira et al. 2014). Martinez-Garcia et al and Chan et al reported missing data for SGRQ domains with a range 2.0-7.9% and 1.3-7.2% respectively (Martinez Garcia et al. 2005, Chan et al. 2002). Quittner et al also reported minimal missing data for QOL-B for all domains with the exception of treatment burden (up to 8.7%) (Quittner et al. 2014, Quittner et al. 2015).

References in online supplement.

## **ONLINE APPENDIX 6**

### **ASSOCIATIONS BETWEEN HEALTH-RELATED QUALITY OF LIFE QUESTIONNAIRES**

Several studies reported the strength of association between HRQOL questionnaires. The correlation coefficients ranged from weak to strong. The SGRQ total score correlated with CAT (Chalmers et al. 2014), SNOT-20 and LCQ (Murray et al. 2009, Munoz et al. 2013) ( $r=0.72$ ,  $r=0.72$  and  $\rho=-0.70$  respectively, all  $p<0.01$ ). SGRQ total correlated weakly to moderately with SF-36 Physical (range  $r=-0.35$  to  $-0.68$ ,  $p<0.01$ ) (Wilson et al. 1997a, Chan et al. 2002) and QOL-B V2.0/V3.0 (range  $r=-0.34$  to  $-0.81$ ,  $p<0.01$ ) (Quittner et al. 2010, Casilda Oliveira et al. 2014, Quittner et al. 2014). The LCQ correlated strongly with SGRQ ( $\rho=-0.70$ ,  $p<0.01$ ) and CQLQ ( $r=-0.88$ ,  $p<0.001$ ) (Lee et al. 2010) and moderately with CRDQ total ( $r=0.51$ ,  $p<0.01$ ) (Lee et al. 2010) and EuroQOL ( $r=0.52$  to  $0.67$ ,  $p<0.001$ ) (Polley et al. 2008). The correlation between QOL-B domains and EuroQOL was weak to moderate ( $r=0.29$  to  $0.66$ ,  $p<0.001$ ) (Quittner et al. 2015).

References in online supplement.

**ONLINE SUPPLEMENT Table E1.** Systematic review search terms and number of retrieved studies for each database.

| <b>Keywords</b>                    | <b>Pubmed</b>   | <b>Embase</b>   | <b>Medline</b> | <b>Cochrane</b> | <b>PsycINFO</b> |
|------------------------------------|-----------------|-----------------|----------------|-----------------|-----------------|
| bronchiectasis AND quality of life | 241             | 71 <sup>#</sup> | 207            | 11              | 7               |
| bronchiectasis AND QOL             | 28              | 50              | 15             | 1               | 4               |
| bronchiectasis AND health status   | 94              | 93              | 59             | 2               | 2               |
| bronchiectasis AND psychometrics   | 2               | 0               | 1              | 0               | 1               |
| bronchiectasis AND well being      | 86 <sup>#</sup> | 18              | 7              | 5               | 0               |
| bronchiectasis AND psychology      | 39              | 12              | 2              | 1               | 0               |
| bronchiectasis AND daily living    | 57              | 10              | 12             | 1               | 0               |
| bronchiectasis AND HRQOL           | 8               | 22              | 8              | 2               | 0               |
| bronchiectasis AND questionnaire   | 160             | 268             | 118            | 2               | 7               |
| bronchiectasis AND validation      | 34              | 61              | 27             | 5               | 1               |
| bronchiectasis AND validity        | 15              | 29              | 11             | 0               | 1               |

<sup>#</sup>: The search was conducted using the keyword “non-cystic fibrosis bronchiectasis” instead of “bronchiectasis”. This more specific search was used to limit the number of studies obtained using “bronchiectasis” (the number of retrieved results using “bronchiectasis” was 1,303 and 542 for Pubmed and Embase respectively).

**ONLINE SUPPLEMENT Table E2.** Average health-related quality of life scores for Leicester Cough Questionnaire, St George's Respiratory Questionnaire and Quality of Life - Bronchiectasis.

**Table E2-a.** Leicester Cough Questionnaire (LCQ).

| <b>Author 1<sup>st</sup>, year</b> | <b>n</b>   | <b>LCQ Total</b> |
|------------------------------------|------------|------------------|
| Polley, 2008                       | 26         | 14.1             |
| Ozalp, 2012                        | 20         | 14.7             |
| Murray, 2009a                      | 120        | 16.9             |
| Munoz, 2013                        | 259        | 15.1             |
| Altenburg, 2014                    | 30         | 17.2             |
| Goeminne, 2014                     | 63         | 15.3             |
| Mandal, 2013                       | 163        | 17.3             |
| <b>Total/Mean</b>                  | <b>681</b> | <b>15.8</b>      |

**Table E2-b.** St George's Respiratory Questionnaire (SGRQ).

| <b>Author 1<sup>st</sup>, year</b> | <b>n</b>    | <b>SGRQ Total</b> |
|------------------------------------|-------------|-------------------|
| Wilson, 1997 & O'Leary, 2002       | 111         | 44.4              |
| Wilson, 1997 & Wilson, 1998        | 87          | 44.4              |
| Martinez-Garcia, 2005              | 102         | 45.8              |
| Eshed, 2007                        | 46          | 41.7              |
| Guilemany, 2009                    | 80          | 34.2              |
| Batchelor, 2011                    | 608         | 42.6              |
| Chalmers, 2014                     | 19          | 19.1              |
| Oliveira, 2014a & 2014b            | 91          | 45.9              |
| Loebinger, 2009                    | 62          | 31.5              |
| Lee, 2012                          | 70          | 32.5              |
| Moreno, 2013                       | 60          | 38.2              |
| Rowan, 2014                        | 144         | 32.3              |
| Ozalp, 2012                        | 32          | 45.7              |
| Murray, 2009b                      | 141         | 35.4              |
| Munoz, 2013                        | 30          | 27.1              |
| <b>Total/Mean</b>                  | <b>1683</b> | <b>37.4</b>       |

**Table E2-c.** Quality of Life - Bronchiectasis (QOL-B).

| <b>Author 1<sup>st</sup>, year</b> | <b>n</b>   | <b>QOL-B</b>                    |                 |                               |                               |                             |                                 |                             |                                  |
|------------------------------------|------------|---------------------------------|-----------------|-------------------------------|-------------------------------|-----------------------------|---------------------------------|-----------------------------|----------------------------------|
|                                    |            | <b>Physical<br/>Functioning</b> | <b>Vitality</b> | <b>Health<br/>Perceptions</b> | <b>Social<br/>Functioning</b> | <b>Role<br/>Functioning</b> | <b>Respiratory<br/>Symptoms</b> | <b>Treatment<br/>Burden</b> | <b>Emotional<br/>Functioning</b> |
| McCullough, 2011                   | 71         | 31.0                            | 37.0            | 39.0                          | 42.0                          | 46.0                        | 53.0                            | 56.0                        | 73.0                             |
| Quittner, 2014                     | 89         | 44.7                            | 46.7            | 42.1                          | 47.8                          | 58.4                        | 49.5                            | 66.2                        | 79.8                             |
| Quittner, 2015                     | 542        | 51.2                            | 49.9            | 44.7                          | 54.0                          | 63.0                        | 56.0                            | 65.6                        | 77.8                             |
| Oliveira, 2014a & 2014b            | 207        | 57.5                            | 57.6            | 46.5                          | 72.4                          | 70.4                        | 70.7                            | 67.1                        | 71.0                             |
| <b>Total/Mean</b>                  | <b>909</b> | <b>46.1</b>                     | <b>47.8</b>     | <b>43.1</b>                   | <b>54.1</b>                   | <b>59.5</b>                 | <b>57.3</b>                     | <b>63.7</b>                 | <b>75.4</b>                      |

Mean scores unless otherwise stated.

HRQOL scores not available from the included studies in the systematic review are not listed in this table.

For references see main paper and online supplement.

**ONLINE SUPPLEMENT Table E3.** Minimal clinically important difference (MCID) of health-related quality of life questionnaires utilized in bronchiectasis studies.

| Questionnaire       | MCID study disease population | MCID (units)        | Studies                                              |
|---------------------|-------------------------------|---------------------|------------------------------------------------------|
| QOL-B               | Bronchiectasis                | 0 to 13.3 (domains) | (Quittner et al. 2015, Casilda Oliveira et al. 2014) |
| SGRQ                | COPD                          | 4.0                 | (Jones 2005)                                         |
|                     | COPD                          | 5.8                 | (Schunemann et al. 2003)                             |
|                     | IPF                           | 7.0                 | (Swigris et al. 2005)                                |
| LCQ                 | Chronic cough                 | 1.3                 | (Raj et al. 2009)                                    |
| CQLQ                | IPF                           | 5.0 to 5.7          | (Lechtzin et al. 2013)                               |
|                     | Chronic cough                 | 10.6                | (Fletcher et al. 2010)                               |
| CAT                 | COPD                          | 1.2 to 3.8          | (Kon et al. 2013)                                    |
| SF-36               | IPF                           | 2.0 to 4.0          | (Swigris et al. 2005)                                |
| EuroQOL (EQ-5D VAS) | COPD                          | 8.0                 | (Zanini et al. 2015)                                 |
| CRDQ                | COPD                          | 0.5                 | (Jaeschke et al. 1989)                               |

COPD: chronic obstructive pulmonary disease, IPF: idiopathic pulmonary fibrosis, SGRQ: St George's Respiratory Questionnaire, LCQ: Leicester Cough Questionnaire, CQLQ: Cough Quality of Life Questionnaire, CAT: COPD Assessment Tool, SF-36: Short Form-36, CRDQ: Chronic Respiratory Disease Questionnaire.

References in online supplement.

**ONLINE SUPPLEMENT Table E4.** Standardised response mean for the included questionnaires, based on randomised-control trials identified in original study search.

| Study                         | Quest. | Interv.<br>(n) | Control<br>(n) | Intervention           | Age<br>(yr) | FEV  | Fm<br>(%) | Total Sample |          |        | Intervention Group |          |        | Control Group |          |        |
|-------------------------------|--------|----------------|----------------|------------------------|-------------|------|-----------|--------------|----------|--------|--------------------|----------|--------|---------------|----------|--------|
|                               |        |                |                |                        |             |      |           | SRM          | (95% CI) |        | SRM                | (95% CI) |        | SRM           | (95% CI) |        |
| (Bilton et al. 2013)          | SGRQ   | 231            | 112            | Mannitol               | 62          | 74.7 | 65        | -1.21        | (-1.40,  | -1.05) | -3.34              | (-3.62,  | -3.10) | -0.53         | (-0.80,  | -0.30) |
| (Bilton et al. 2014)          | SGRQ   | 233            | 228            | Mannitol               | 60          | 62.2 | 63        | -0.69        | (-0.80,  | -0.56) | -0.78              | (-0.97,  | -0.60) | -0.60         | (-0.80,  | -0.40) |
| (Diego et al. 2013)           | SGRQ   | 16             | 14             | Azithromycin           | 59          | 62.0 | 53        | -0.67        | (-1.20,  | -0.14) | -2.55              | (-3.53,  | -1.60) | 1.08          | ( 0.25,  | 1.91)  |
| (Drobnic et al. 2005)         | SGRQ   | 20             | 20             | Tobramycin             | 65          | 51.8 | NR        | -0.15        | (-0.60,  | 0.29)  | -0.23              | (-0.87,  | 0.41)  | -0.12         | (-0.80,  | 0.52)  |
| (Haworth et al. 2014)         | SGRQ   | 73             | 71             | Colistin               | 59          | 56.7 | 58        | -0.10        | (-0.30,  | 0.13)  | -0.13              | (-0.46,  | 0.20)  | -0.06         | (-0.40,  | 0.27)  |
| (Hernando et al. 2012)        | SGRQ   | 37             | 33             | Budesonide             | 67          | 64.6 | 51        | -0.35        | (-0.70,  | -0.01) | -0.07              | (-0.53,  | 0.39)  | -1.60         | (-2.20,  | -1.00) |
| (Lavery et al. 2011)          | SGRQ   | 32             | 32             | S-management           | 60          | 61.0 | 55        | -0.20        | (-0.60,  | 0.15)  | -0.46              | (-0.96,  | 0.05)  | 0.06          | (-0.40,  | 0.56)  |
| (Liaw et al. 2011)            | SGRQ   | 13             | 13             | IMT                    | 60          | 67.4 | 85        | -0.62        | (-1.20,  | -0.05) | -0.51              | (-1.32,  | 0.30)  | -0.72         | (-1.50,  | 0.11)  |
| (Maa et al. 2007)             | SGRQ   | 11             | 13             | Acupressure            | 59          | NR   | 40        | -0.19        | (-0.80,  | 0.39)  | -0.32              | (-1.20,  | 0.57)  | -0.09         | (-0.90,  | 0.71)  |
| (Mandal et al. 2012)          | SGRQ   | 12             | 15             | Exercise               | 65          | 74.0 | 47        | -0.81        | (-1.40,  | -0.25) | -1.23              | (-2.15,  | -0.30) | -0.33         | (-1.10,  | -0.41) |
| (Martínez-García et al. 2006) | SGRQ   | 29             | 28             | Fluticasone propionate | 69          | 61.0 | 29        | -0.18        | (-0.50,  | 0.19)  | -0.24              | (-0.76,  | 0.29)  | -0.10         | (-0.60,  | 0.44)  |
| (Newall et al, 2005)          | SGRQ   | 12             | 9              | Exercise               | 60          | 67.5 | 91        |              |          |        | -0.64              | (-1.50,  | 0.22)  |               |          |        |
| (Nicolson et al. 2012)        | SGRQ   | 20             | 20             | HTS                    | 57          | 82.6 | 63        | -0.47        | (-0.90,  | -0.02) | -0.58              | (-1.23,  | 0.07)  | -0.34         | (-1.00,  | 0.30)  |
| (Serisier et al. 2013a)       | SGRQ   | 22             | 20             | Ciprofloxacin          | 65          | 56.9 | 55        | -0.46        | (-0.90,  | -0.02) | -0.18              | (-0.79,  | 0.42)  | -0.70         | (-1.40,  | 0)     |
| (Serisier et al. 2013b)       | SGRQ   | 59             | 58             | Erythromycin           | 62          | 71.0 | 61        | -0.28        | (-0.50,  | -0.02) | -0.45              | (-0.82,  | -0.10) | -0.17         | (-0.50,  | 0.20)  |
| (Stockley et al. 2013)        | SGRQ   | 22             | 16             | NEI                    | 62          | NR   | 55        | -0.31        | (-0.80,  | 0.15)  | -0.43              | (-1.04,  | 0.19)  | -0.12         | (-0.80,  | 0.60)  |
| (Bilton et al. 2013)          | LCQ    | 231            | 112            | Mannitol               | 62          | 74.7 | 65        | 0.22         | ( 0.07,  | 0.37)  | 0.28               | ( 0.09,  | 0.46)  | 0.09          | (-0.20,  | 0.35)  |
| (Lee et al. 2014)             | LCQ    | 43             | 42             | Exercise               | 64          | 73.5 | 72        | 0.23         | (-0.10,  | 0.54)  | 0.11               | (-0.31,  | 0.54)  | 0.35          | (-0.10,  | 0.78)  |
| (Nicolson et al. 2012)        | LCQ    | 20             | 20             | HTS                    | 57          | 82.6 | 63        | 2.48         | ( 1.89,  | 3.08)  | 2.99               | ( 2.05,  | 3.93)  | 2.10          | ( 1.30,  | 2.90)  |
| (Mandal et al. 2012)          | LCQ    | 12             | 15             | Exercise               | 65          | 74.0 | 47        | 0.68         | ( 0.12,  | 1.24)  | 1.13               | ( 0.22,  | 2.04)  | 0.14          | (-0.60,  | 0.88)  |
| (Mandal et al. 2014)          | LCQ    | 30             | 30             | Atorvastatin           | 60          | 76.1 | 52        | 0.11         | (-0.20,  | 0.47)  | 0.35               | (-0.17,  | 0.87)  | -0.16         | (-0.70,  | 0.36)  |
| (Serisier et al. 2013b)       | LCQ    | 59             | 58             | Erythromycin           | 62          | 71.0 | 61        | 0.31         | ( 0.05,  | 0.57)  | 0.39               | ( 0.02,  | 0.76)  | 0.23          | (-0.10,  | 0.60)  |



| Study                              | Quest.   | Interv.<br>(n) | Control<br>(n) | Intervention | Age<br>(yr) | FEV  | Fm<br>(%) | Total Sample |          |       | Intervention Group |          |       | Control Group |          |       |
|------------------------------------|----------|----------------|----------------|--------------|-------------|------|-----------|--------------|----------|-------|--------------------|----------|-------|---------------|----------|-------|
|                                    |          |                |                |              |             |      |           | SRM          | (95% CI) |       | SRM                | (95% CI) |       | SRM           | (95% CI) |       |
| (Quittner et al. 2015)-<br>AIR-BX1 | QOL-B    | 134            | 132            | Aztreonam    | 65          | 62.5 | 68        |              |          |       |                    |          |       |               |          |       |
|                                    | Resp. S. |                |                |              |             |      |           | 0.32         | ( 0.15,  | 0.49) | 0.29               | ( 0.05,  | 0.53) | 0.38          | ( 0.13,  | 0.62) |
|                                    | Phys. F. |                |                |              |             |      |           | -0.03        | (-0.20,  | 0.14) | -0.08              | (-0.32,  | 0.16) | 0.05          | (-0.20,  | 0.29) |
|                                    | Vitality |                |                |              |             |      |           | 0.05         | (-0.10,  | 0.22) | 0.02               | (-0.22,  | 0.26) | 0.10          | (-0.10,  | 0.34) |
|                                    | Role F.  |                |                |              |             |      |           | 0.02         | (-0.20,  | 0.19) | -0.07              | (-0.32,  | 0.17) | 0.16          | (-0.10,  | 0.41) |
|                                    | Heal. P. |                |                |              |             |      |           | -0.01        | (-0.20,  | 0.16) | 0.03               | (-0.21,  | 0.27) | -0.05         | (-0.30,  | 0.19) |
|                                    | Emot. F. |                |                |              |             |      |           | 0.00         | (-0.20,  | 0.17) | 0.01               | (-0.23,  | 0.25) | 0.00          | (-0.20,  | 0.24) |
|                                    | Soc. F.  |                |                |              |             |      |           | 0.09         | (-0.10,  | 0.26) | 0.07               | (-0.17,  | 0.31) | 0.12          | (-0.10,  | 0.37) |
| Treat. B.                          |          |                |                |              |             |      | -0.18     | (-0.30,      | -0.01)   | -0.12 | (-0.37,            | 0.12)    | -0.22 | (-0.50,       | 0.02)    |       |
| (Quittner et al. 2015)-<br>AIR-BX2 | QOL-B    | 136            | 138            | Aztreonam    | 63          | 63.6 | 69        |              |          |       |                    |          |       |               |          |       |
|                                    | Resp. S. |                |                |              |             |      |           | 0.37         | ( 0.20,  | 0.54) | 0.47               | ( 0.22,  | 0.71) | 0.27          | ( 0.03,  | 0.50) |
|                                    | Phys. F. |                |                |              |             |      |           | -0.01        | (-0.20,  | 0.16) | -0.06              | (-0.30,  | 0.17) | 0.07          | (-0.20,  | 0.30) |
|                                    | Vitality |                |                |              |             |      |           | 0.03         | (-0.10,  | 0.20) | -0.03              | (-0.27,  | 0.21) | 0.10          | (-0.10,  | 0.34) |
|                                    | Role F.  |                |                |              |             |      |           | -0.08        | (-0.30,  | 0.09) | -0.11              | (-0.35,  | 0.13) | -0.05         | (-0.30,  | 0.19) |
|                                    | Heal. P. |                |                |              |             |      |           | 0.08         | (-0.10,  | 0.25) | 0.05               | (-0.19,  | 0.29) | 0.11          | (-0.10,  | 0.35) |
|                                    | Emot. F. |                |                |              |             |      |           | 0.16         | ( 0,     | 0.33) | 0.10               | (-0.14,  | 0.34) | 0.23          | ( 0,     | 0.47) |
|                                    | Soc. F.  |                |                |              |             |      |           | 0.09         | (-0.10,  | 0.25) | 0.03               | (-0.21,  | 0.26) | 0.15          | (-0.10,  | 0.39) |
| Treat. B.                          |          |                |                |              |             |      | -0.29     | (-0.50,      | -0.12)   | -0.24 | (-0.48,            | 0)       | -0.33 | (-0.60,       | -0.10)   |       |
| (Quittner et al. 2015)-<br>AIR-BX1 | EQ-5D    | 134            | 132            | Aztreonam    | 65          | 62.5 | 68        | 0.10         | (-0.10,  | 0.27) | 0.17               | (-0.07,  | 0.41) | 0.01          | (-0.20,  | 0.25) |
| (Quittner et al. 2015)-<br>AIR-BX2 | EQ-5D    | 136            | 138            | Aztreonam    | 63          | 63.6 | 69        | 0.04         | (-0.10,  | 0.21) | 0.13               | (-0.10,  | 0.37) | -0.05         | (-0.30,  | 0.19) |

Data presented as means, unless otherwise stated.

Quest.: Questionnaire, Interv.: Intervention, Emot. F.: Emotional functioning, Fm: Female, FB: formoterol-budesonide combined, FEV: Forced Expiratory Volume in the first second % predicted, Heal. P.: Health perceptions, HTS: hypertonic saline, IMT: inspiratory muscle training, NEI: neutrophil elastase inhibitor, NR: Not reported, Phys. F.: Physical functioning, PR: pulmonary rehabilitation, Resp. S: Respiratory symptoms, Role F.: Role functioning, S-management: self-management, Soc. F.: Social functioning, Treat. B.: Treatment burden.

Data presented from Quittner et al, 2015 also include relevant data by Baker et al, 2014.

References in online supplement.

**ONLINE SUPPLEMENT Table E5.** Correlations of health-related quality of life with other clinical measures reported in single studies (not included in the meta-analysis).

| <b>Clinical Measures</b>                            | <b>N</b> | <b>Correlation coefficient</b> |
|-----------------------------------------------------|----------|--------------------------------|
| Chronic rhinosinusitis                              | 80       | 0.96*                          |
| Nasal symptoms                                      | 80       | 0.67*                          |
| Maximum expiratory pressure                         | 20       | -0.51*                         |
| Short-acting $\beta_2$ -agonist                     | 86       | 0.49*                          |
| Oral steroids cycles                                | 86       | 0.41*                          |
| Respiratory failure                                 | 86       | 0.36*                          |
| Cough reflex sensitivity                            | 86       | 0.32                           |
| Karnofsky performance scale (functional impairment) | 93       | -0.30*                         |
| Long-acting $\beta_2$ -agonist                      | 86       | 0.27*                          |
| Number of lobes affected by bronchiectasis          | 46       | 0.25*                          |
| Fibrogen                                            | 86       | 0.24                           |
| Timed up and go (mobility and balance test)         | 20       | -0.15                          |

N: number of study subjects; \*  $p < 0.05$

**ONLINE SUPPLEMENT Figure E1.** Forest plot for the correlation between health-related quality of life and wheeze.

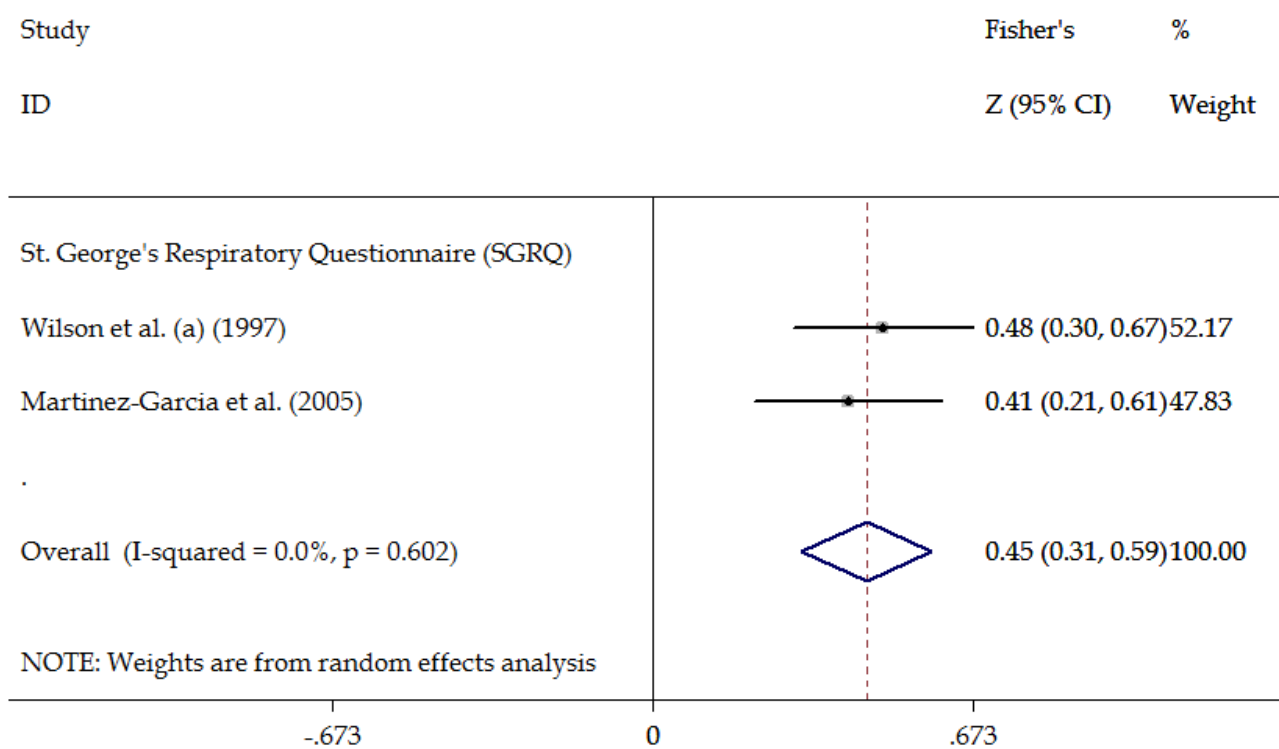

For references see main paper and online supplement.

**ONLINE SUPPLEMENT Figure E2.** Forest plot for the correlation between health-related quality of life and fatigue.

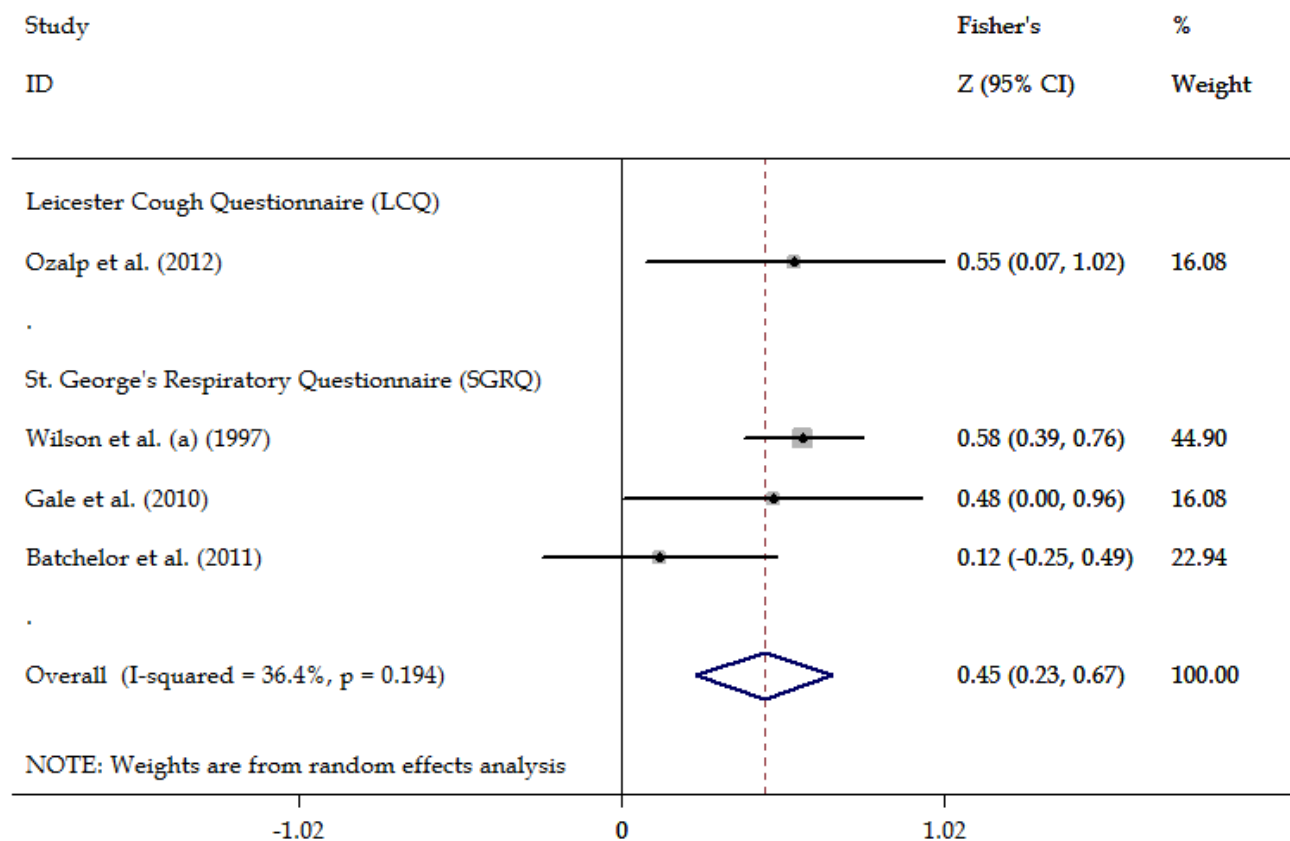

Measurements of fatigue used: 14-point fatigue scale (Wilson et al. 1997a), fatigue severity scale (Ozalp et al. 2012), multidimensional fatigue inventory (Gale et al. 2010) and functional assessment of chronic illness therapy - fatigue questionnaire (Batchelor et al. 2011).

For references see main paper and online supplement.

**ONLINE SUPPLEMENT Figure E3.** Forest plot for the correlation between health-related quality of life and depression.

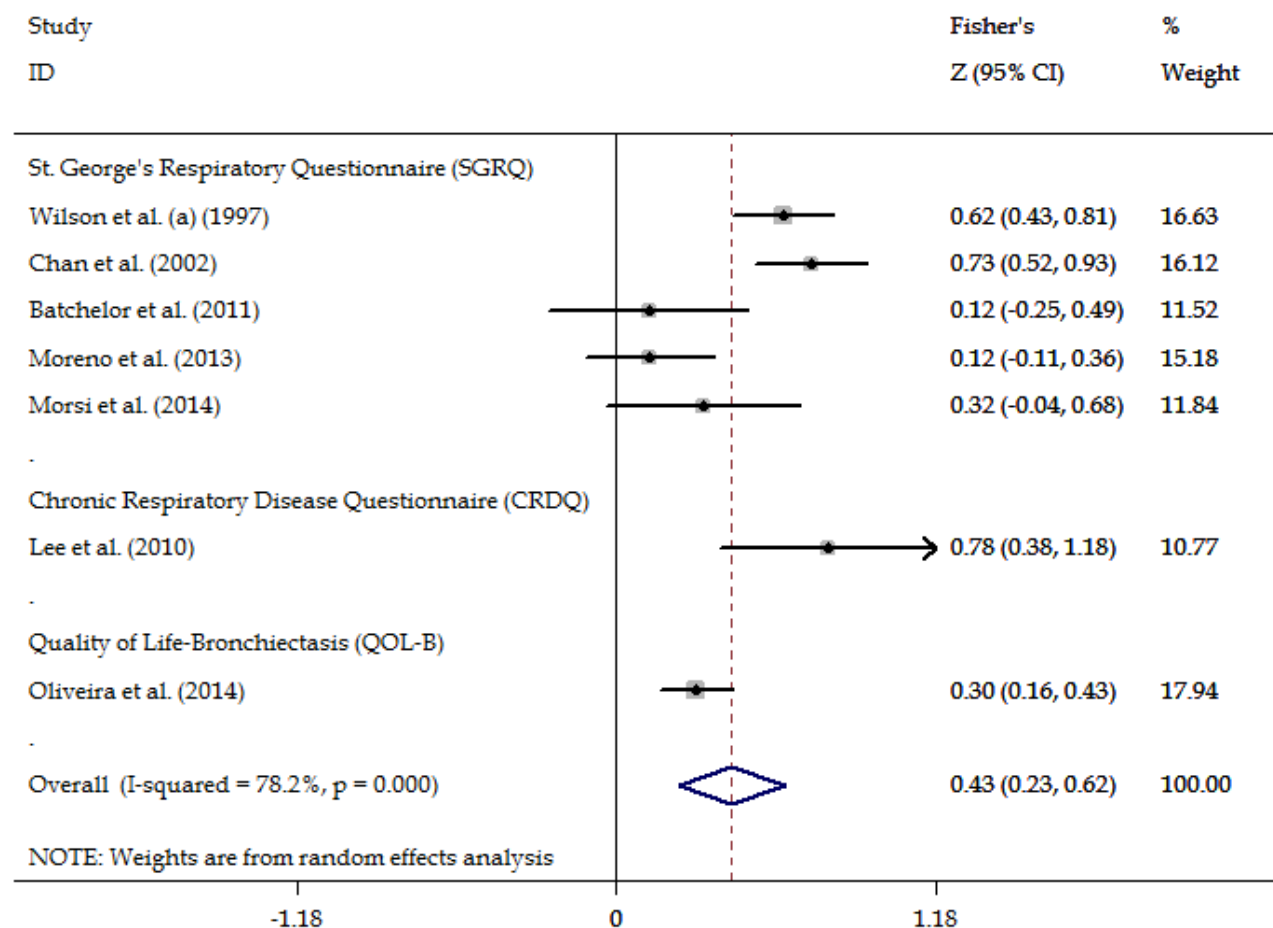

Arrow indicates that the confidence intervals extent the limits of the current graph.

Measurements of depression used: hospital and anxiety scale (Wilson et al. 1997a, Chan et al. 2002, Lee et al. 2010, C. Oliveira et al. 2014), centre for epidemiologic studies depression scale (Batchelor et al. 2011), state-trait anxiety inventory (Giron Moreno et al. 2013), Hamilton depression rating scale (Morsi et al. 2014).

For references see main paper and online supplement.

**ONLINE SUPPLEMENT Figure E4.** Forest plot for the correlation between health-related quality of life and sputum volume.

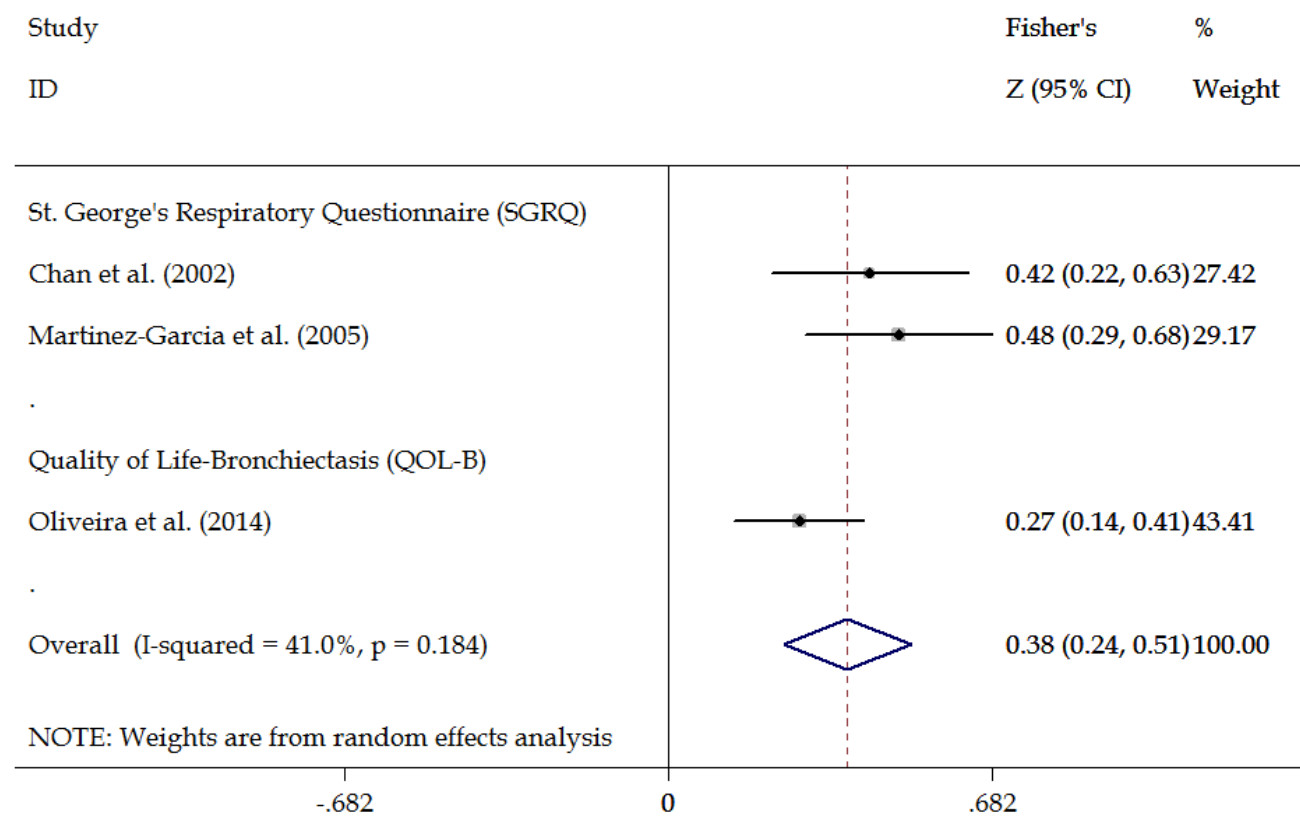

Measurements of sputum volume used for all studies: mean volume of sputum collected every 24 hours on three successive days.

For references see main paper and online supplement.

**ONLINE SUPPLEMENT Figure E5.** Forest plot for the correlation between health-related quality of life and presence/colonisation with *Pseudomonas aeruginosa*.

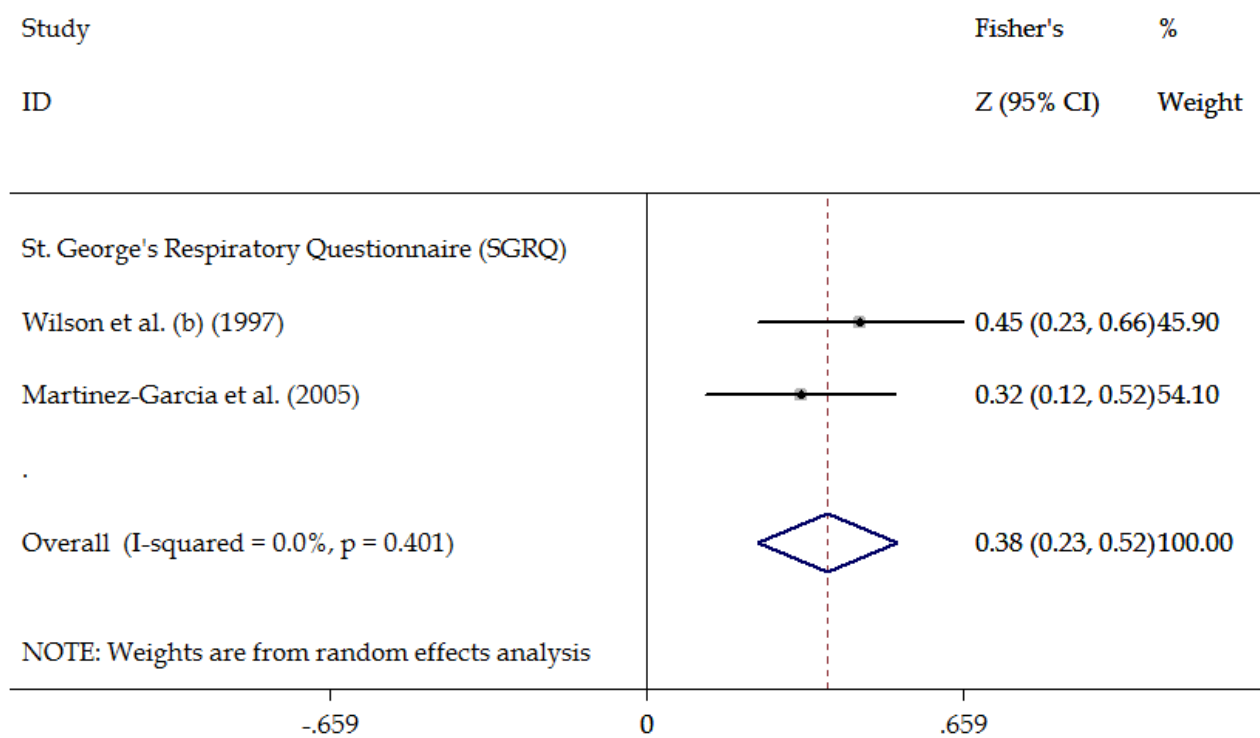

For references see main paper and online supplement.



**ONLINE SUPPLEMENT Figure E6.** Forest plot for the correlation between health-related quality of life and extent of bronchiectasis on computed tomography scan.

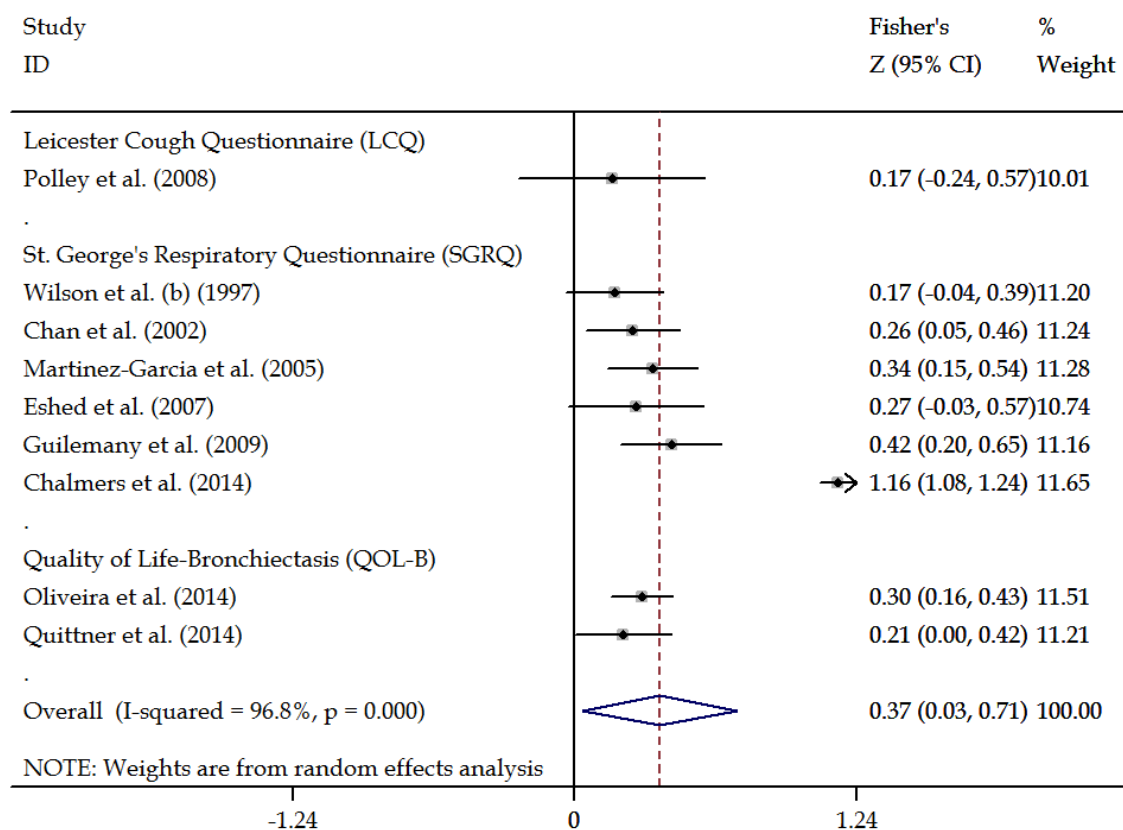

Measurements of extent of bronchiectasis used: Bhalla score (Eshed et al. 2007, Polley et al. 2008, Martinez Garcia et al. 2005, Casilda Oliveira et al. 2014), Reiff score (Wilson et al. 1997b, Chalmers et al. 2014), other specified scores (Guilemany et al. 2009, Quittner et al. 2014) and number of bronchiectatic lobes (Chan et al. 2002).

For references see main paper and online supplement.

**ONLINE SUPPLEMENT Figure E7.** Forest plot for the correlation between health-related quality of life and oxygen saturation.

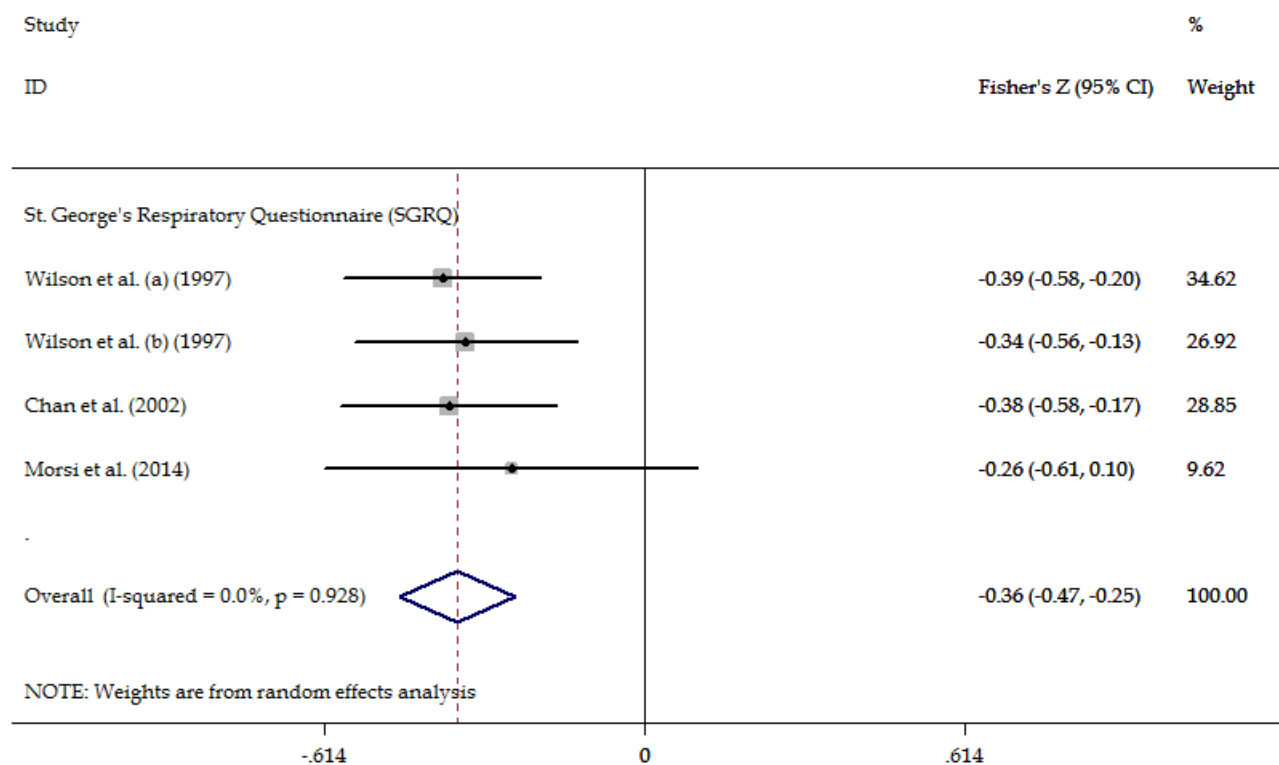

Measurements of oxygen saturation used: earlobe sampling (Wilson et al. 1997a, Wilson et al. 1997b) and pulse oximetry (Chan et al. 2002, Morsi et al. 2014) .

For references see main paper and online supplement.

**ONLINE SUPPLEMENT Figure E8.** Forest plot for the correlation between health-related quality of life and anxiety.

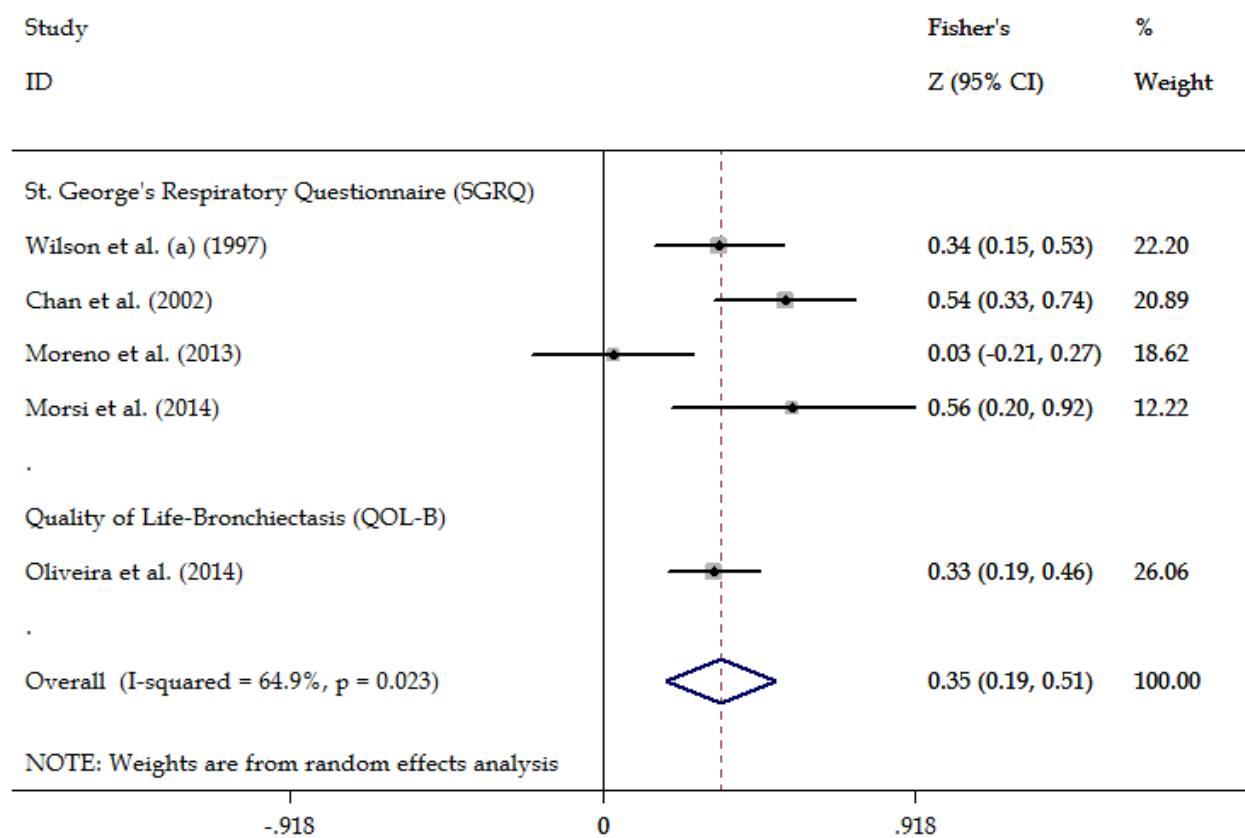

Measurements of anxiety used: hospital anxiety and depression scale (Chan et al. 2002, Wilson et al. 1997a, C. Oliveira et al. 2014), Hamilton anxiety rating scale (Morsi et al. 2014) and state trait anxiety inventory (Giron Moreno et al. 2013) .

For references see main paper and online supplement.

**ONLINE SUPPLEMENT Figure E9.** Forest plot for the correlation between health-related quality of life and rate of hospital admissions.

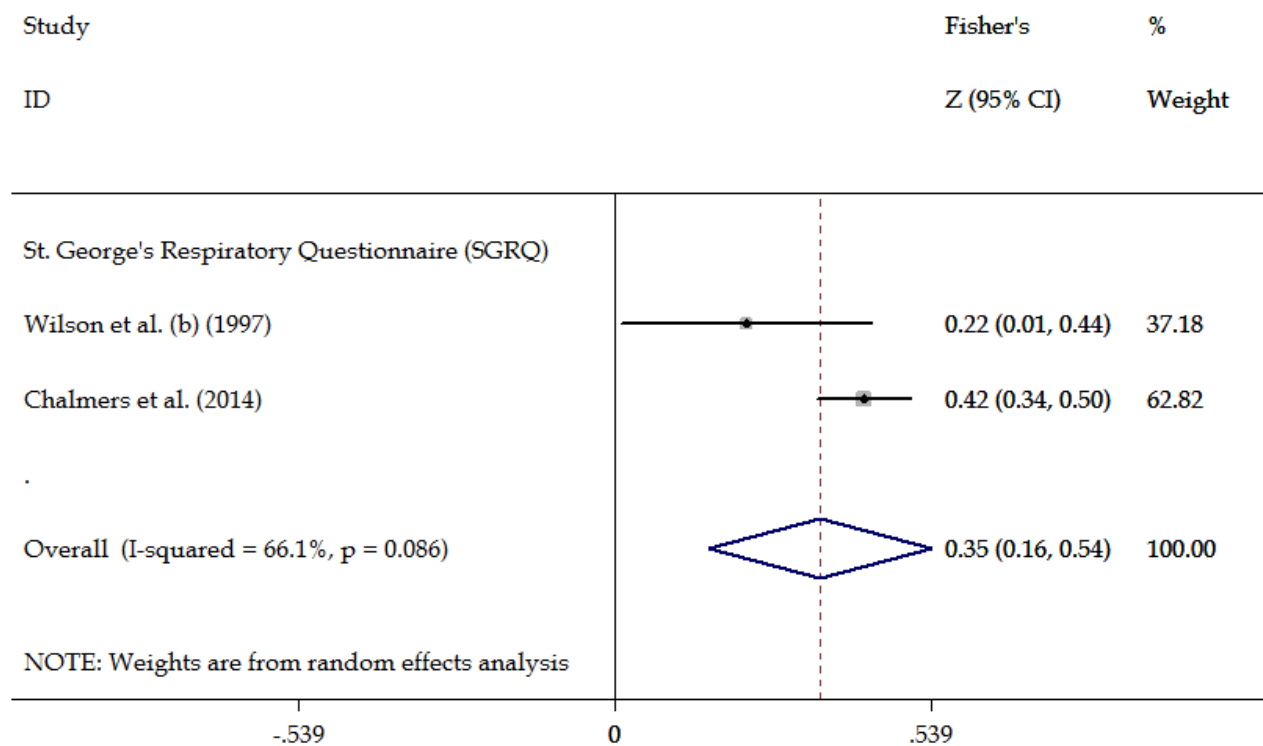

For references see main paper and online supplement.

**ONLINE SUPPLEMENT Figure E10.** Forest plot for the correlation between health-related quality of life and rate of infections/exacerbations.

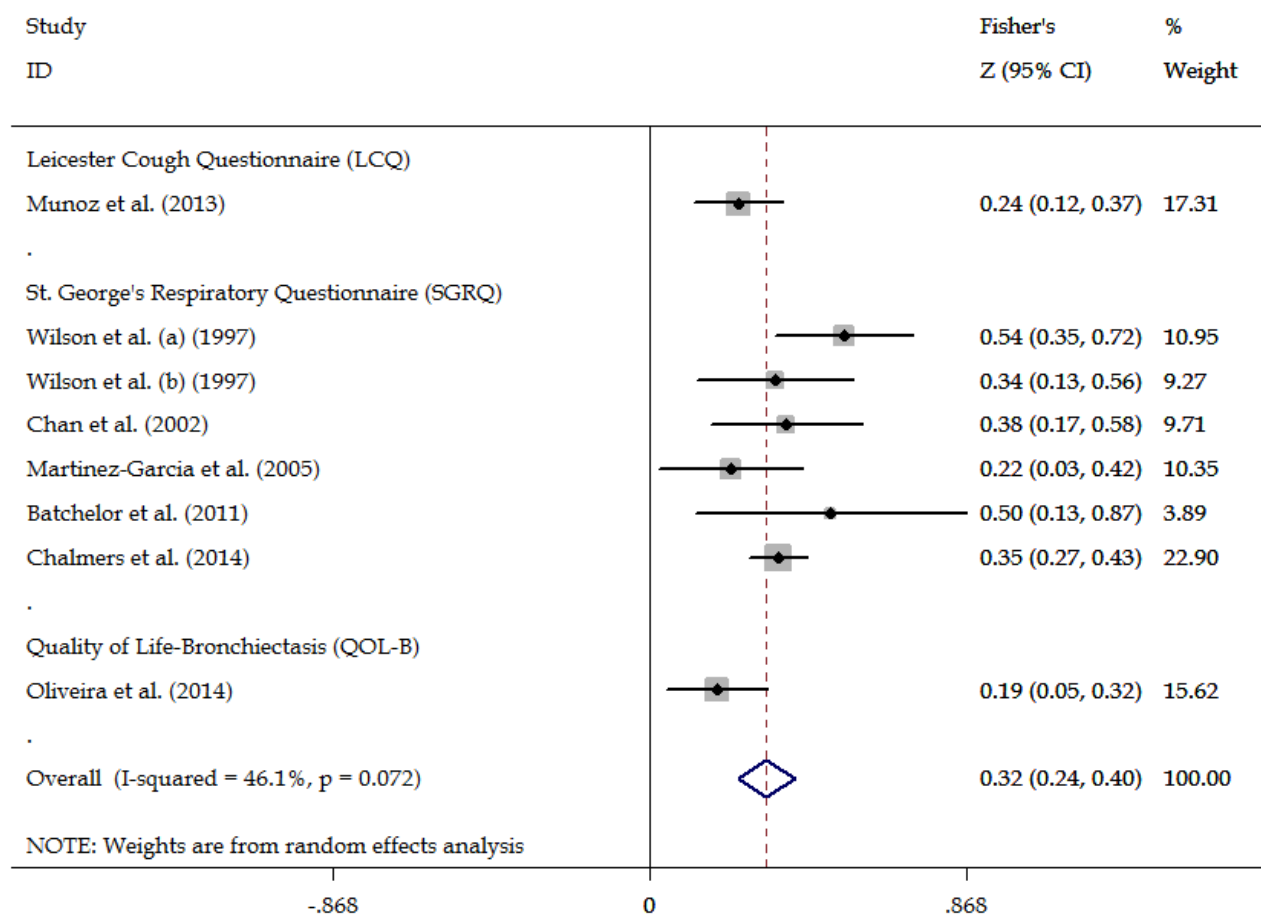

For references see main paper and online supplement.

**ONLINE SUPPLEMENT Figure E11.** Forest plot for the correlation between health-related quality of life and forced vital capacity (FVC).

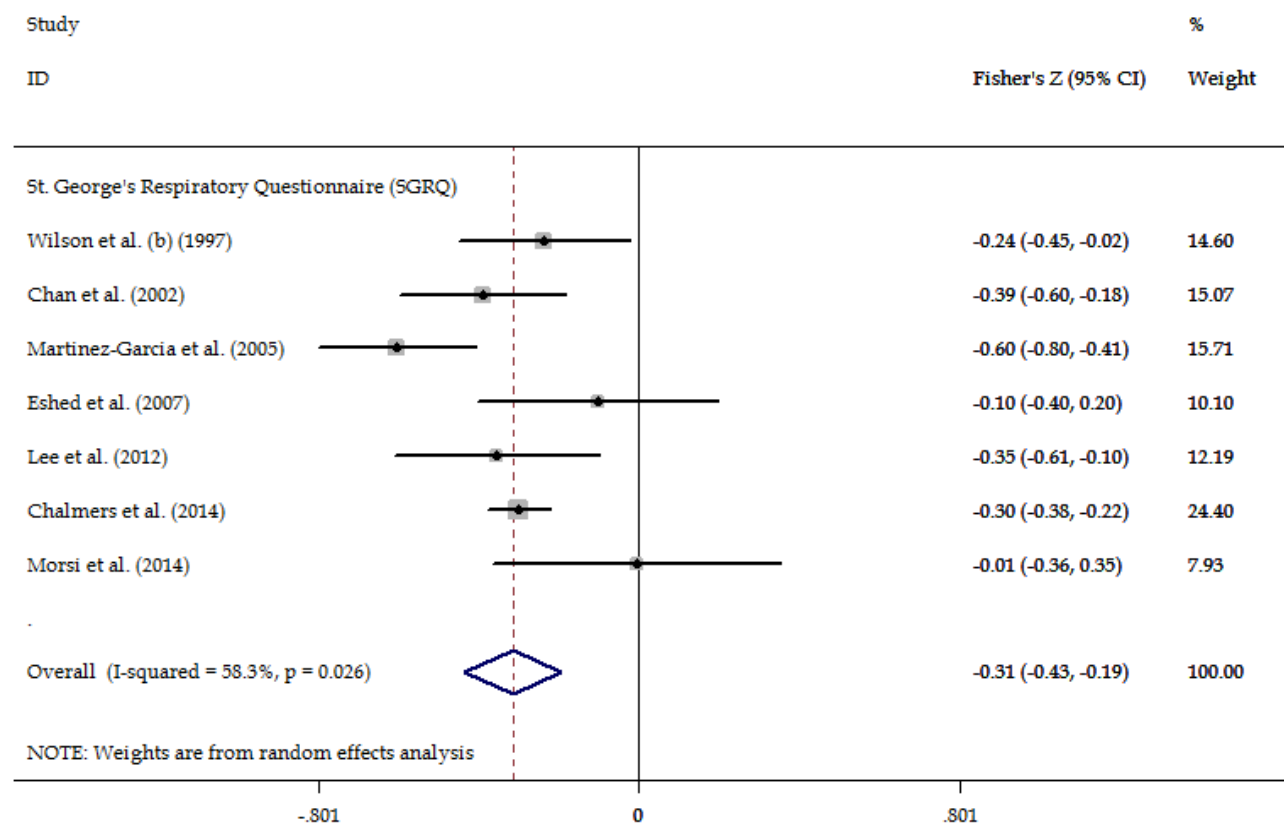

For references see main paper and online supplement.

**ONLINE SUPPLEMENT Figure E12.** Forest plot for the correlation between health-related quality of life and sputum colour.

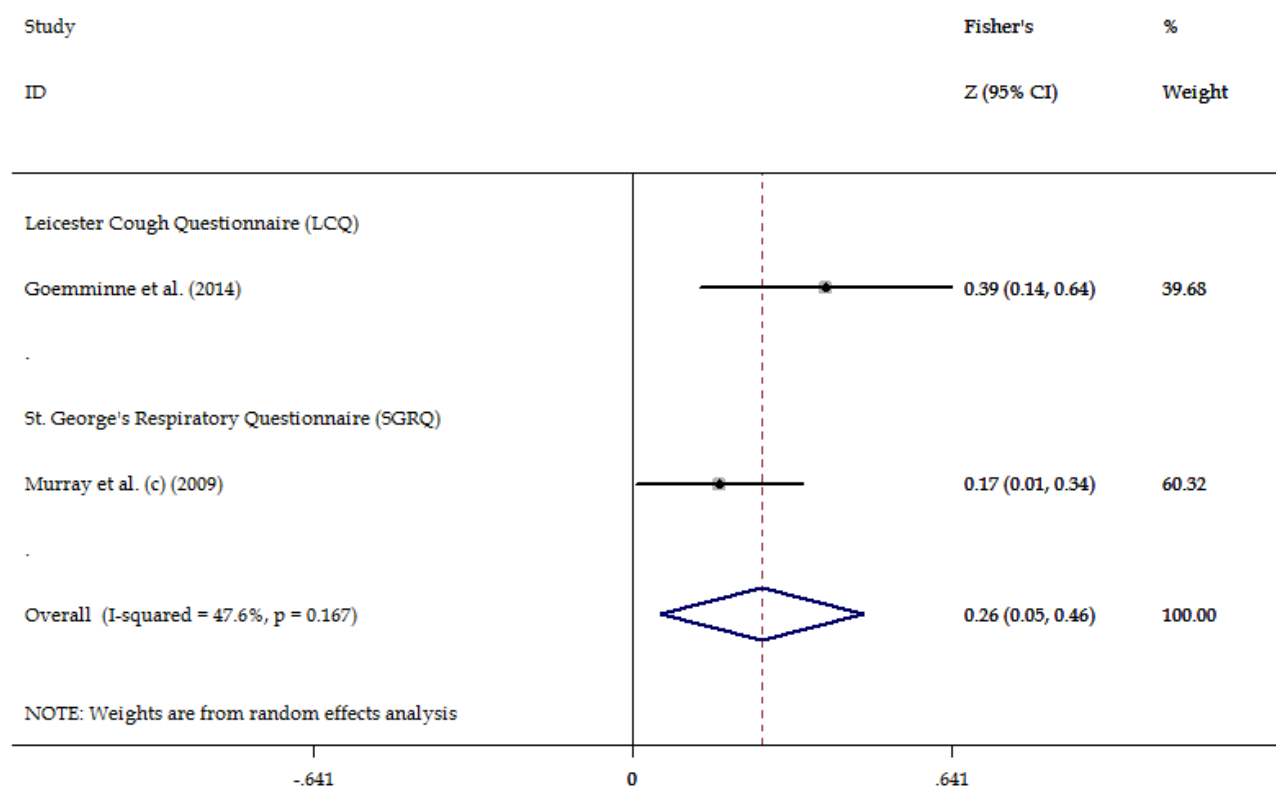

Measurements of sputum colour used for both studies: sputum colour chart.

For references see main paper and online supplement

**ONLINE SUPPLEMENT Figure E13.** Forest plot for the correlation between health-related quality of life and positive bacterial sputum culture.

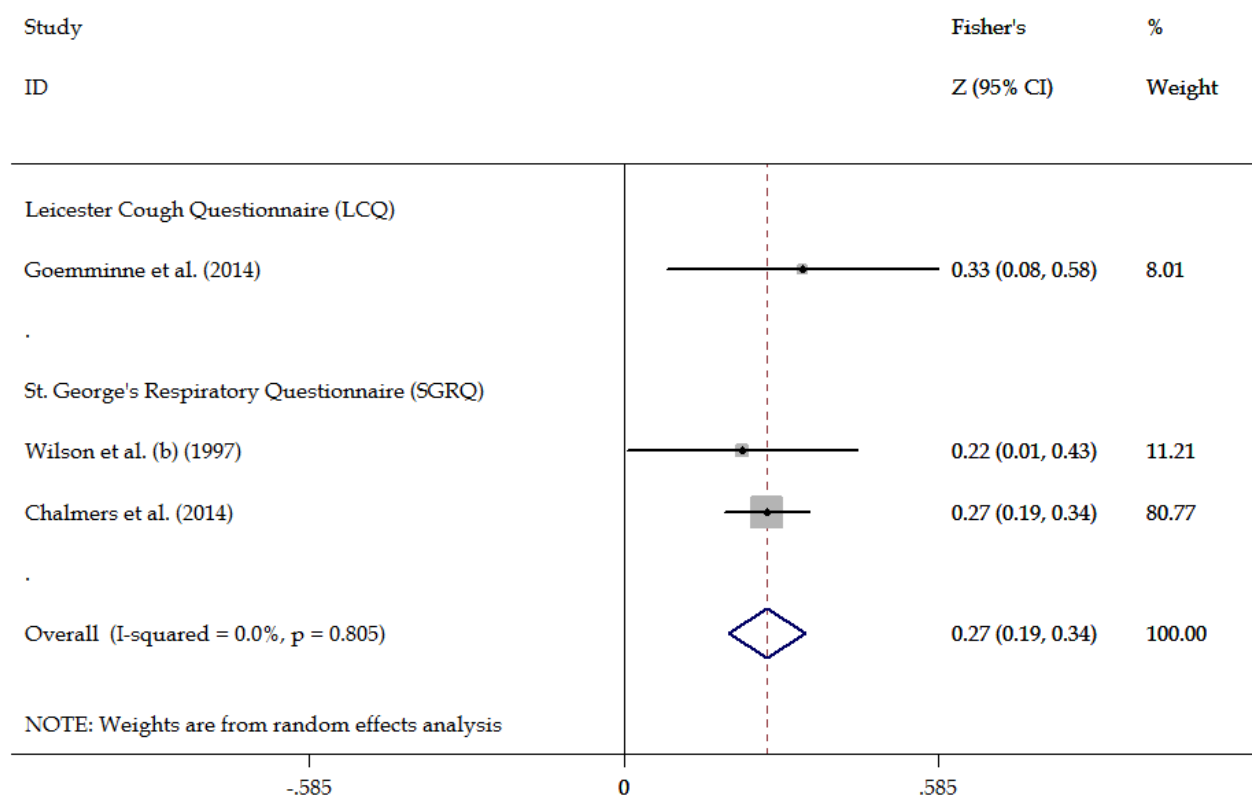

For references see main paper and online supplement.



**ONLINE SUPPLEMENT Figure E14.** Forest plot for the correlation between health-related quality of life and comorbidities.

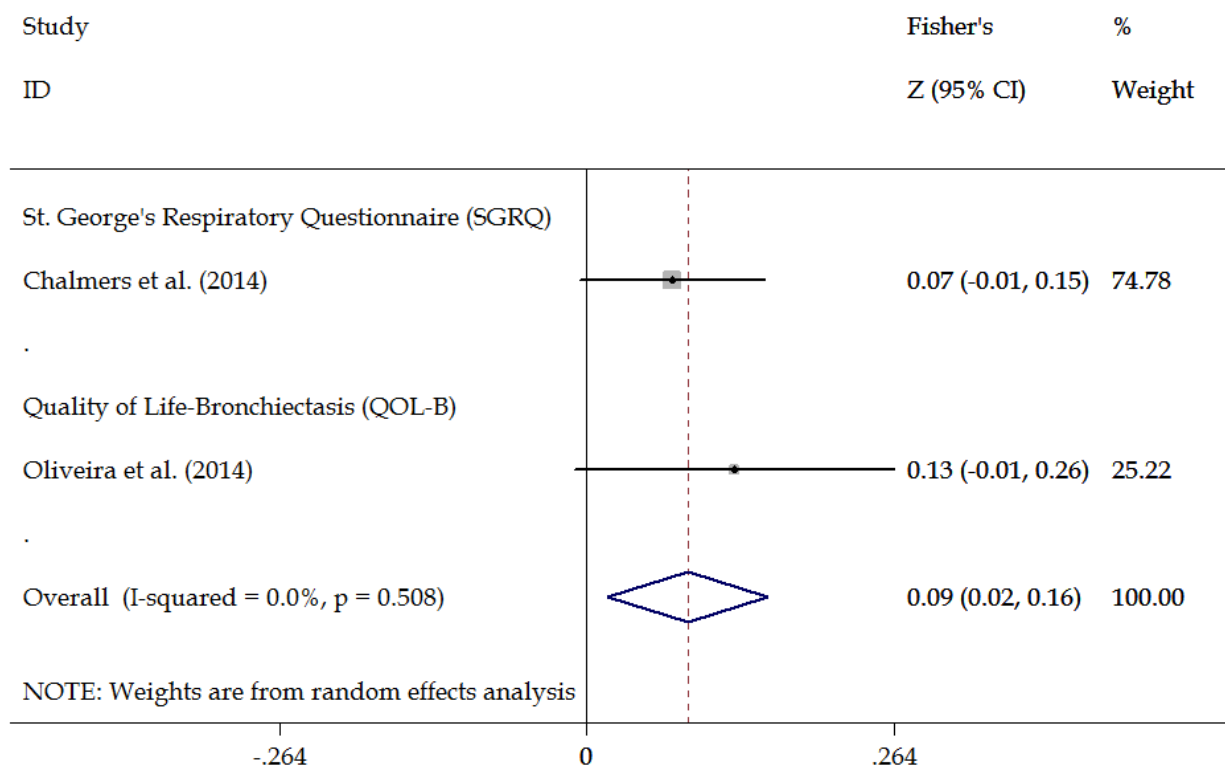

For references see main paper and online supplement.

**ONLINE SUPPLEMENT Figure E15.** Funnel plot of FEV<sub>1</sub>% assessing the publication bias for the relevant meta-analysis studies.

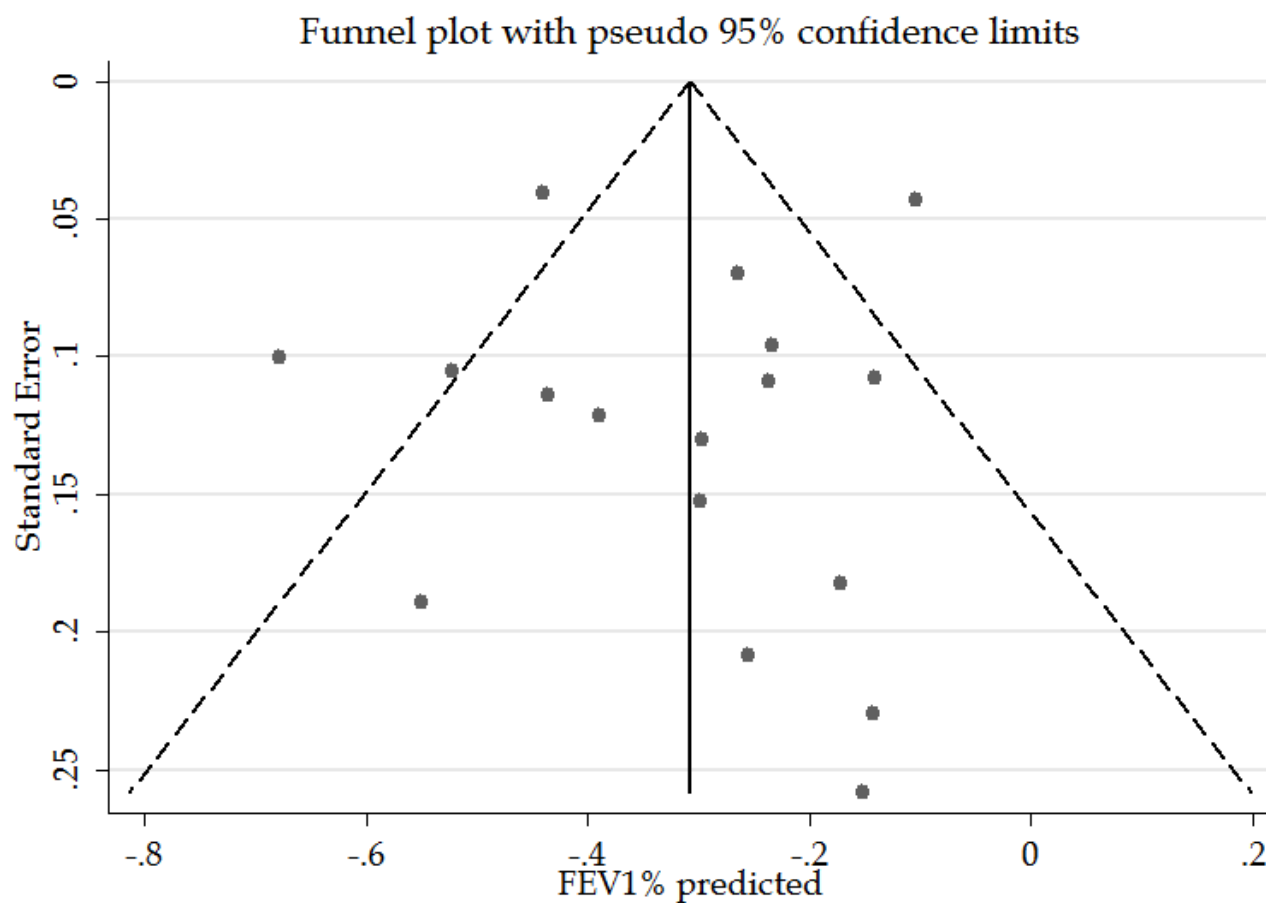

Each study is illustrated as a dot. Symmetric image of the funnel plot studies distribution indicates no publication bias.

**ONLINE SUPPLEMENT Figure E16.** Funnel plot of exercise capacity assessing the publication bias for the relevant meta-analysis studies.

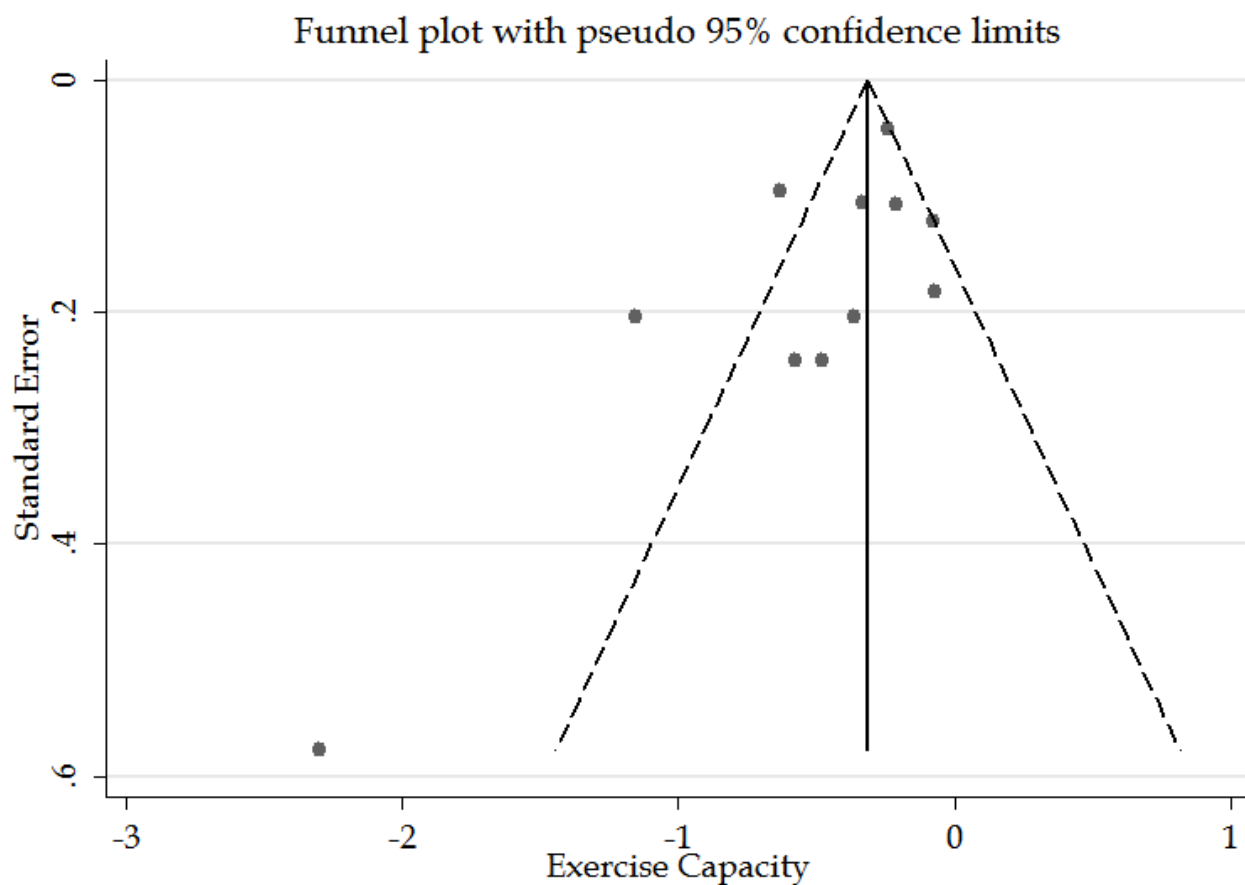

Each study is illustrated as a dot. Asymmetric image of the funnel plot studies distribution indicates possibility of publication bias.

## REFERENCES

Altenburg, J., Wortel, K., de Graaff, C. S., van der Werf, T. S. and Boersma, W. G. (2014) 'Validation of a visual analogue score (LRTI-VAS) in non-CF bronchiectasis', *Clin Respir J*, On-line First [accessed Aug 8].

Barker, A. F., O'Donnell, A. E., Flume, P., Thompson, P. J., Ruzi, J. D., de Gracia, J., Boersma, W. G., De Soyza, A., Shao, L., Zhang, J., Haas, L., Lewis, S. A., Leitzinger, S., Montgomery, A. B., McKevitt, M. T., Gossage, D., Quittner, A. L. and O'Riordan, T. G. (2014) 'Aztreonam for inhalation solution in patients with non-cystic fibrosis bronchiectasis (AIR-BX1 and AIR-BX2): two randomised double-blind, placebo-controlled phase 3 trials', *Lancet Respir Med*, 2(9), 738-749.

Batchelor, H., Brill, S., Brown, J. S. and Hurst, J. R. (2011) 'Associations of depression, fatigue and quality of life in adult non-CF bronchiectasis', *Thorax*, 66, A168. (Abstract).

Bilton, D., Daviskas, E., Anderson, S. D., Kolbe, J., King, G., Stirling, R. G., Thompson, B. R., Milne, D. and Charlton, B. (2013) 'Phase 3 randomized study of the efficacy and safety of inhaled dry powder mannitol for the symptomatic treatment of non-cystic fibrosis bronchiectasis', *Chest*, 144(1), 215-225.

Bilton, D., Tino, G., Barker, A. F., Chambers, D. C., De Soyza, A., Dupont, L. J., O'Dochartaigh, C., van Haren, E. H., Vidal, L. O., Welte, T., Fox, H. G., Wu, J. and Charlton, B. (2014) 'Inhaled mannitol for non-cystic fibrosis bronchiectasis: a randomised, controlled trial', *Thorax*, 69(12):1073-1079.

Birring, S. S., Prudon, B., Carr, A. J., Singh, S. J., Morgan, M. D. and Pavord, I. D. (2003) 'Development of a symptom specific health status measure for patients with chronic cough: Leicester Cough Questionnaire (LCQ)', *Thorax*, 58(4), 339-343.

Borenstein, M., Hedges, L. V., Higgins, J. P. T. and Rothstein, H. R. (2011) *Introduction to Meta-Analysis*, Chichester, UK: Wiley.

Brooks, R. (1996) 'EuroQol: the current state of play', *Health Policy*, 37(1), 53-72.

Chalmers, J. D., Goeminne, P., Aliberti, S., McDonnell, M. J., Lonni, S., Davidson, J., Poppelwell, L., Salih, W., Pesci, A., Dupont, L. J., Fardon, T. C., De Soyza, A. and Hill, A. T. (2014) 'The bronchiectasis severity index. An international derivation and validation study', *Am J Respir Crit Care Med*, 189(5), 576-585.

Chan, S. L., Chan-Yeung, M. M., Ooi, G. C., Lam, C. L., Cheung, T. F., Lam, W. K. and Tsang, K. W. (2002) 'Validation of the Hong Kong Chinese version of the St. George Respiratory Questionnaire in patients with bronchiectasis', *Chest*, 122(6), 2030-2037.

Cochrane Group. 'Recommendations on testing for funnel plot asymmetry'. [http://hanbook.cochrane.org/chapter\\_10/10\\_4\\_3\\_1\\_recommendations\\_on\\_testing\\_for\\_funnel\\_plot\\_assymetry.htm](http://hanbook.cochrane.org/chapter_10/10_4_3_1_recommendations_on_testing_for_funnel_plot_assymetry.htm). Accessed 8 April 2014.

Diego, A. D., Milara, J., Martinez-Moragon, E., Palop, M., Leon, M. and Cortijo, J. (2013) 'Effects of long-term azithromycin therapy on airway oxidative stress markers in non-cystic fibrosis bronchiectasis', *Respirology*, 18(7), 1056-1062.

Drobnic, M. E., Sune, P., Montoro, J. B., Ferrer, A. and Orriols, R. (2005) 'Inhaled tobramycin in non-cystic fibrosis patients with bronchiectasis and chronic bronchial infection with *Pseudomonas aeruginosa*', *Ann Pharmacother*, 39(1), 39-44.

Eshed, I., Minski, I., Katz, R., Jones, P. W. and Priel, I. E. (2007) 'Bronchiectasis: correlation of high-resolution CT findings with health-related quality of life', *Clin Radiol*, 62(2), 152-159.

Fletcher, K. E., French, C. T., Irwin, R. S., Corapi, K. M. and Norman, G. R. (2010) 'A prospective global measure, the Punum Ladder, provides more valid assessments of quality of life than a retrospective transition measure', *J Clin Epidemiol*, 63(10), 1123-1131.

French, C. T., Irwin, R. S., Fletcher, K. E. and Adams, T. M. (2002) 'Evaluation of a cough-specific quality-of-life questionnaire', *Chest*, 121(4), 1123-1131.

Gale, N. S., Duckers, J. M., Munnery, M., Enright, S. and Shale, D. J. (2010) 'Functional impairment in patients with bronchiectasis', *Thorax*, 65, A178. (Abstract)

Galindo-Pacheco, L. V., Amaya-Mejia, A. S., O'Farrill-Romanillos, P. M., Del Rivero-Hernandez, L. G. and Segura-Mendez, N. H. (2013) 'Quality of life in adults with variable common immunodeficiency and bronchiectasis', *Rev Alerg Mex*, 60(3), 123-128.

Gao, Y., Guan, W., Xu, G., Lin, Z., Tang, Y., Li, H., Luo, Q., Zhong, N. and Chen, R. (2014) 'Sleep disturbances and health-related quality of life in adults with steady-state bronchiectasis', *PLoS One*, 9(7), e102970.

Giron Moreno, R. M., Fernandes Vasconcelos, G., Cisneros, C., Gomez-Punter, R. M., Segrelles Calvo, G. and Ancochea, J. (2013) 'Presence of anxiety and depression in patients with bronchiectasis unrelated to cystic fibrosis. *Arch Bronconeumol*, 49(10), 415-420.

Guilemany, J. M., Alobid, I., Angrill, J., Ballesteros, F., Bernal-Sprekelsen, M., Picado, C. and Mullol, J. (2006) 'The impact of bronchiectasis associated to sinonasal disease on quality of life', *Respir Med*, 100(11), 1997-2003.

Guilemany, J. M., Angrill, J., Alobid, I., Centellas, S., Prades, E., Roca, J., Pujols, L., Bernal-Sprekelsen, M., Picado, C. and Mullol, J. (2009) 'United airways: the impact of chronic

rhinosinusitis and nasal polyps in bronchiectatic patient's quality of life', *Allergy*, 64(10), 1524-1529.

Guyatt, G. H., Berman, L. B., Townsend, M., Pugsley, S. O. and Chambers, L. W. (1987) 'A measure of quality of life for clinical trials in chronic lung disease', *Thorax*, 42(10), 773-778.

Haworth, C. S., Foweraker, J. E., Wilkinson, P., Kenyon, R. F. and Bilton, D. (2014) 'Inhaled colistin in patients with bronchiectasis and chronic *Pseudomonas aeruginosa* infection', *Am J Respir Crit Care Med*, 189(8), 975-982.

Hernando, R., Drobnic, M. E., Cruz, M. J., Ferrer, A., Sune, P., Montoro, J. B. and Orriols, R. (2012) 'Budesonide efficacy and safety in patients with bronchiectasis not due to cystic fibrosis', *Int J Clin Pharm*, 34(4), 644-650.

Higgins, J. P. and Thompson, S. G. (2002) 'Quantifying heterogeneity in a meta-analysis', *Stat Med*, 21(11), 1539-1558.

Higgins, J. P., Thompson, S. G., Deeks, J. J. and Altman, D. G. (2003) 'Measuring inconsistency in meta-analyses', *Bmj*, 327(7414), 557-560.

Huisman, A. N., Wu, M. Z., Uil, S. M. and van den Berg, J. W. (2007) 'Reliability and validity of a Dutch version of the Leicester Cough Questionnaire', *Cough*, 3, 3.

Jacques, P. S., Gazzana, M. B., Palombini, D. V., Barreto, S. S. and Dalcin Pde, T. (2012a) 'Six-minute walk distance is not related to quality of life in patients with non-cystic fibrosis bronchiectasis', *J Bras Pneumol*, 38(3), 346-355.

Jacques, P. S., Gazzana, M. B., Palombini, D. V., Barreto, S. S. M. and Dalcin, P. T. R. (2012b) 'Six-minute walk distance is not related to quality of life in patients with non-cystic fibrosis bronchiectasis. *Jornal Brasileiro de Pneumologia*, 38(3), 346-355.

Jaeschke, R., Singer, J. and Guyatt, G. H. (1989) 'Measurement of health status. Ascertaining the minimal clinically important difference', *Control Clin Trials*, 10(4), 407-415.

Jones, P. W. (2005) 'St. George's Respiratory Questionnaire: MCID', *COPD*, 2(1), 75-79.

Jones, P. W., Harding, G., Berry, P., Wiklund, I., Chen, W. H. and Kline Leidy, N. (2009) 'Development and first validation of the COPD Assessment Test', *Eur Respir J*, 34(3), 648-654.

Jones, P. W., Quirk, F. H., Baveystock, C. M. and Littlejohns, P. (1992) 'A self-complete measure of health status for chronic airflow limitation. The St. George's Respiratory Questionnaire', *Am Rev Respir Dis*, 145(6), 1321-1327.

Kalpaklioglu, A. F., Kara, T., Kurtipek, E., Kocyigit, P., Ekici, A. and Ekici, M. (2005) 'Evaluation and impact of chronic cough: comparison of specific vs generic quality-of-life questionnaires', *Ann Allergy Asthma Immunol*, 94(5), 581-585.

Kon, S. S. C., Clark, A. L., Dilaver, D., Canavan, J. L., Patel, M. S., Polkey, M. I. and Man, W. D. C. (2013) 'Response of the COPD Assessment Test to pulmonary rehabilitation in unselected chronic respiratory disease', *Respirology*, 18(6), 974-977.

Lavery, K. A., O'Neill, B., Parker, M., Elborn, J. S. and Bradley, J. M. (2011) 'Expert patient self-management program versus usual care in bronchiectasis: a randomized controlled trial', *Arch Phys Med Rehabil*, 92(8), 1194-1201.

Lechtzin, N., Hilliard, M. E. and Horton, M. R. (2013) 'Validation of the Cough Quality-of-Life Questionnaire in patients with idiopathic pulmonary fibrosis', *Chest*, 143(6), 1745-1749.

Lee, A. L., Cecins, N., Hill, C. J., Rautela, L., Stirling, R. G., Thompson, P. J., Jenkins, S., Holland, A. E. and McDonald, C. F. (2010) 'Utility of the chronic respiratory questionnaire in non-cystic fibrosis (CF) bronchiectasis', *Respirology*, 15, A78.

Lee, A. L., Hill, C. J., Cecins, N., Jenkins, S., McDonald, C. F., Burge, A. T., Rautela, L., Stirling, R. G., Thompson, P. J. and Holland, A. E. (2014) 'The short and long term effects of exercise training in non-cystic fibrosis bronchiectasis - a randomised controlled trial', *Respiratory Research*, 15(1), 41.

Lee, B. Y., Lee, S., Lee, J. S., Song, J. W., Lee, S. D., Jang, S. H., Jung, K. S., Hwang, Y. I. and Oh, Y. M. (2012) 'Validity and Reliability of CAT and Dyspnea-12 in Bronchiectasis and Tuberculous Destroyed Lung', *Tuberc Respir Dis (Seoul)*, 72(6), 467-474.

Liaw, M. Y., Wang, Y. H., Tsai, Y. C., Huang, K. T., Chang, P. W., Chen, Y. C. and Lin, M. C. (2011) 'Inspiratory muscle training in bronchiectasis patients: a prospective randomized controlled study', *Clin Rehabil*, 25(6), 524-536.

Maa, S.-H., Tsou, T.-S., Wang, K.-Y., Wang, C.-H., Lin, H.-C. and Huang, Y.-H. (2007) 'Self-administered acupressure reduces the symptoms that limit daily activities in bronchiectasis patients: Pilot study findings', *Journal of Clinical Nursing*, 16(4), 794-804.

Mandal, P., Chalmers, J. D., Graham, C., Harley, C., Sidhu, M. K., Doherty, C., Govan, J. W., Sethi, T., Davidson, D. J., Rossi, A. G. and Hill, A. T. (2014) 'Atorvastatin as a stable treatment in bronchiectasis: a randomised controlled trial', *Lancet Respir Med*, 2(6), 455-463.

Mandal, P., Sidhu, M. K., Kope, L., Pollock, W., Stevenson, L. M., Pentland, J. L., Turnbull, K., Mac Quarrie, S. and Hill, A. T. (2012) 'A pilot study of pulmonary rehabilitation and chest physiotherapy versus chest physiotherapy alone in bronchiectasis', *Respir Med*, 106(12), 1647-1654.

Martínez-García, M. A., Perpiñá-Tordera, M., Román-Sánchez, P. and Soler-Cataluña, J. J. (2006) 'Inhaled steroids improve quality of life in patients with steady-state bronchiectasis', *Respir Med*, 100(9), 1623-1632.

Martinez Garcia, M. A., Perpina Tordera, M., Roman Sanchez, P. and Soler Cataluna, J. J. (2005) 'Internal consistency and validity of the Spanish version of the St. George's respiratory questionnaire for use in patients with clinically stable bronchiectasis', *Arch Bronconeumol*, 41(3), 110-117.

McCullough, A. R., Hughes, C. M., Tunney, M., Elborn, J. S. and Bradley, J. M. (2011) 'Assessment of health related quality of life (HRQOL) in non-cystic fibrosis bronchiectasis using a new disease-specific tool for measuring HRQOL: The quality of life-bronchiectasis (QOL-B) questionnaire', *Thorax*, 66, A169. (Abstract)

Morsi, T. S., Ghobashy, S. and Younis, G. (2014) 'Quality of life and psychological disorders in Egyptian patients with chronic lung diseases: Clinico-physiological correlation', *Egyptian Journal of Chest Diseases and Tuberculosis*, 63(3), 731-742.

Munoz, G., Oliveira, C., Martinez-Garcia, M. A., Giron, R., Gracia, J. d., Alvarez, A., Buxó, M., Polverino, E., Sabater, G. and Vendrell, M. (2013) 'Validation of a Spanish version of the Leicester Cough Questionnaire in adult patients with non-cystic fibrosis bronchiectasis'. *Eur Respir J*, 42 Issue Suppl 57. (Abstract)

Murray, M. P., Turnbull, K., MacQuarrie, S., Pentland, J. L. and Hill, A. T. (2009) 'Validation of the Leicester Cough Questionnaire in non-cystic fibrosis bronchiectasis', *Eur Respir J*, 34(1), 125-131.

Newall C., Stockley R. A. and Hill S.L. (2005) 'Exercise training and inspiratory muscle training in patients with bronchiectasis'. *Thorax*, 60, 943-948.

Nicolson, C. H., Stirling, R. G., Borg, B. M., Button, B. M., Wilson, J. W. and Holland, A. E. (2012) 'The long term effect of inhaled hypertonic saline 6% in non-cystic fibrosis bronchiectasis', *Respir Med*, 106(5), 661-667.

Oliveira, C., Oliveira, G., Espildora, F., Giron, R.-M., Munoz, G., Quittner, A. L. and Martinez-Garcia, M.-A. (2014) 'Validation of a quality Quality of Life Questionnaire for Bronchiectasis: Psychometric analyses of the Spanish QOL-B-V3.0', *Quality of Life Research: An International Journal of Quality of Life Aspects of Treatment, Care & Rehabilitation*, 23(4), 1279-1292.

Oliveira, C., Oliveira, G., Espildora, F., Giron, R. M., Vendrell, M., Dorado, A. and Martinez-Garcia, M. T. (2014) 'Mediterranean diet is associated on symptoms of depression and anxiety in patients with bronchiectasis', *Gen Hosp Psychiatry*, 36(3), 277-283.



Ozalp, O., Inal-Ince, D., Calik, E., Vardar-Yagli, N., Saglam, M., Savci, S., Arikan, H., Bosnak-Guclu, M. and Coplu, L. (2012) 'Extrapulmonary features of bronchiectasis: muscle function, exercise capacity, fatigue, and health status', *Multidiscip Respir Med*, 7(1), 3.

Piccirillo, J. F., Merritt, M. G., Jr. and Richards, M. L. (2002) 'Psychometric and clinimetric validity of the 20-Item Sino-Nasal Outcome Test (SNOT-20)', *Otolaryngol Head Neck Surg*, 126(1), 41-47.

Polley, L., Yaman, N., Heaney, L., Cardwell, C., Murtagh, E., Ramsey, J., Macmahon, J., Costello, R. W. and McGarvey, L. (2008) 'Impact of cough across different chronic respiratory diseases: comparison of two cough-specific health-related quality of life questionnaires', *Chest*, 134(2), 295-302.

Quittner, A. L., Cruz, I., Marciel, K. K., Ilowite, J., Gotfried, M. H. and Barker, A. (2010) 'Development and Cognitive Testing of the Quality of Life Questionnaire for Bronchiectasis (QOL-B)'. *American Journal of Respiratory and Critical Care Medicine*, 179, A4310. (Abstract)

Quittner, A. L., Marciel, K. K., Salathe, M. A., O'Donnell, A. E., Gotfried, M. H., Ilowite, J. S., Metersky, M. L., Flume, P. A., Lewis, S. A., McKeivitt, M., Montgomery, A. B., O'Riordan, T. G. and Barker, A. F. (2014) 'A preliminary Quality of Life Questionnaire-Bronchiectasis: A patient-reported outcome measure for bronchiectasis', *Chest*, 146(2):437-448.

Quittner, A. L., O'Donnell, A. E., Salathe, M. A., Lewis, S. A., Li, X., Montgomery, A. B., O'Riordan, T. G. and Barker, A. F. (2015) 'Quality of Life Questionnaire-Bronchiectasis: final psychometric analyses and determination of minimal important difference scores', *Thorax*, 70(1), 12-20.

Raj, A. A., Pavord, D. I. and Birring, S. S. (2009) 'Clinical cough IV: what is the minimal important difference for the Leicester Cough Questionnaire?', *Handb Exp Pharmacol*, (187), 311-320.

Schunemann, H. J., Griffith, L., Jaeschke, R., Goldstein, R., Stubbing, D. and Guyatt, G. H. (2003) 'Evaluation of the minimal important difference for the feeling thermometer and the St. George's Respiratory Questionnaire in patients with chronic airflow obstruction', *J Clin Epidemiol*, 56(12), 1170-1176.

Serisier, D. J., Bilton, D., De Soyza, A., Thompson, P. J., Kolbe, J., Greville, H. W., Cipolla, D., Bruinenberg, P. and Gonda, I. (2013a) 'Inhaled, dual release liposomal ciprofloxacin in non-cystic fibrosis bronchiectasis (ORBIT-2): a randomised, double-blind, placebo-controlled trial', *Thorax*, 68(9), 812-817.

Serisier, D. J., Martin, M. L., McGuckin, M. A., Lourie, R., Chen, A. C., Brain, B., Biga, S., Schlebusch, S., Dash, P. and Bowler, S. D. (2013b) 'Effect of long-term, low-dose erythromycin on pulmonary exacerbations among patients with non-cystic fibrosis

bronchiectasis: The BLESS randomized controlled trial', *JAMA - Journal of the American Medical Association*, 309(12), 1260-1267.

Sterne, J. A., Sutton, A. J., Ioannidis, J. P., Terrin, N., Jones, D. R., Lau, J., Carpenter, J., Rucker, G., Harbord, R. M., Schmid, C. H., Tetzlaff, J., Deeks, J. J., Peters, J., Macaskill, P., Schwarzer, G., Duval, S., Altman, D. G., Moher, D. and Higgins, J. P. (2011) 'Recommendations for examining and interpreting funnel plot asymmetry in meta-analyses of randomised controlled trials', *Bmj*, 343, d4002.

Stockley, R., De Soyza, A., Gunawardena, K., Perrett, J., Forsman-Semb, K., Entwistle, N. and Snell, N. (2013) 'Phase II study of a neutrophil elastase inhibitor (AZD9668) in patients with bronchiectasis', *Respir Med*, 107(4), 524-533.

Swigris, J. J., Kuschner, W. G., Jacobs, S. S., Wilson, S. R. and Gould, M. K. (2005) 'Health-related quality of life in patients with idiopathic pulmonary fibrosis: a systematic review', *Thorax*, 60(7), 588-594.

Ware, J. E., Jr. and Sherbourne, C. D. (1992) 'The MOS 36-item short-form health survey (SF-36). I. Conceptual framework and item selection', *Med Care*, 30(6), 473-483.

Wilson, C. B., Jones, P. W., O'Leary, C. J., Cole, P. J. and Wilson, R. (1997a) 'Validation of the St. George's Respiratory Questionnaire in bronchiectasis', *Am J Respir Crit Care Med*, 156(2 Pt 1), 536-541.

Wilson, C. B., Jones, P. W., O'Leary, C. J., Hansell, D. M., Cole, P. J. and Wilson, R. (1997b) 'Effect of sputum bacteriology on the quality of life of patients with bronchiectasis', *Eur Respir J*, 10(8), 1754-1760.

Zanini, A., Aiello, M., Adamo, D., Casale, S., Cherubino, F., Della Patrona, S., Raimondi, E., Zampogna, E., Chetta, A. and Spanevello, A. (2015) 'Estimation of minimal clinically important difference in EQ-5D visual analog scale score after pulmonary rehabilitation in subjects with COPD', *Respir Care*, 60(1), 88-95.
